# Supplementary material
Source: PubMed Central journal article supplement (PMC6612518)
Supplement: mmc1.pdf [file mmc1.pdf]

The American Journal of Human Genetics, Volume 105

## Supplemental Data

### Systematic Functional Interrogation of Genes in GWAS Loci

### Identified *ATF1* as a Key Driver in Colorectal Cancer

### Modulated by a Promoter-Enhancer Interaction

Jianbo Tian, Jiang Chang, Jing Gong, Jiao Lou, Mingpeng Fu, Jiaoyuan Li, Juntao Ke, Ying Zhu, Yajie Gong, Yang Yang, Danyi Zou, Xiating Peng, Nan Yang, Shufang Mei, Xiaoyang Wang, Rong Zhong, Kailin Cai, and Xiaoping Miao

## Supplemental Figures

A

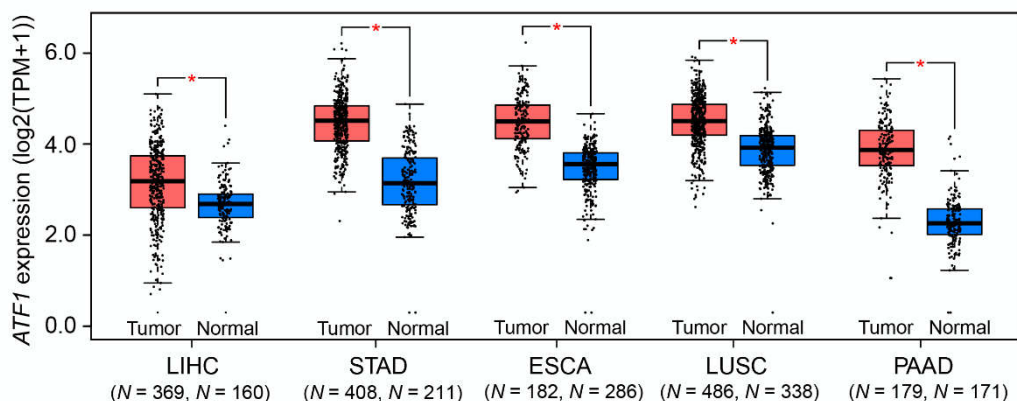

B

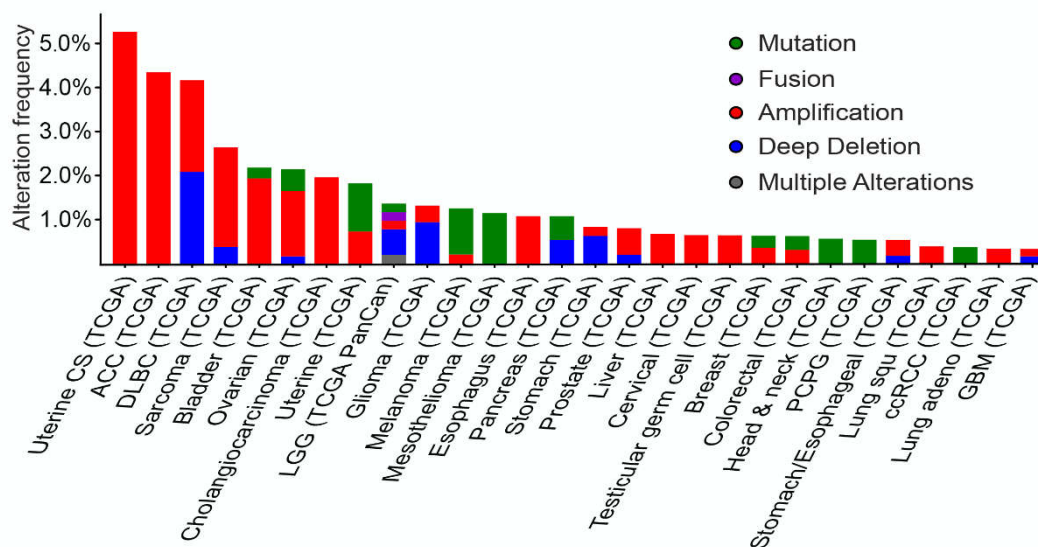

C

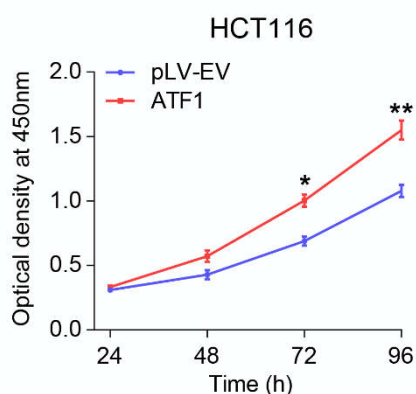

D

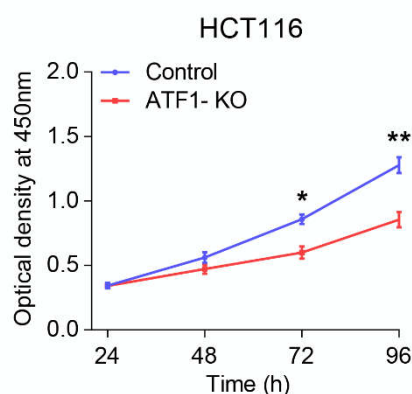

**Figure S1. ATF1 functions as an oncogene in CRC.** A. ATF1 is significantly higher in tumor tissues compared with normal tissues from the TCGA/GTEX databases in multiple cancers. Data were shown as the mean  $\pm$  SD, and all  $*P < 0.05$  were calculated by a two-sided Student's *t*-test. LIHC, liver hepatocellular carcinoma (MIM: 114550); STAD, stomach adenocarcinoma (MIM: 175100); ESCA, esophageal carcinoma (MIM: 133239); LUSC, lung squamous cell carcinoma (MIM: 211980); PAAD, pancreatic adenocarcinoma

(MIM: 260350). **B.** Genomic alterations and aberrant expressions of *ATF1* across multiple cancer types. The data were displayed as a histogram from the “cBioPortal” database. **C,** **D.** *ATF1* overexpression using lentiviral transduction provokes cell proliferation (C), whereas *ATF1* knockout using CRISPR/Cas9 method inhibits cell proliferation in HCT116 cells (D). Data were shown as the mean  $\pm$  s.e.m. from three repeated experiments and each with six replicates and all  $*P < 0.05$ ,  $**P < 0.01$  were calculated using a two-sided Student’s *t*-test.

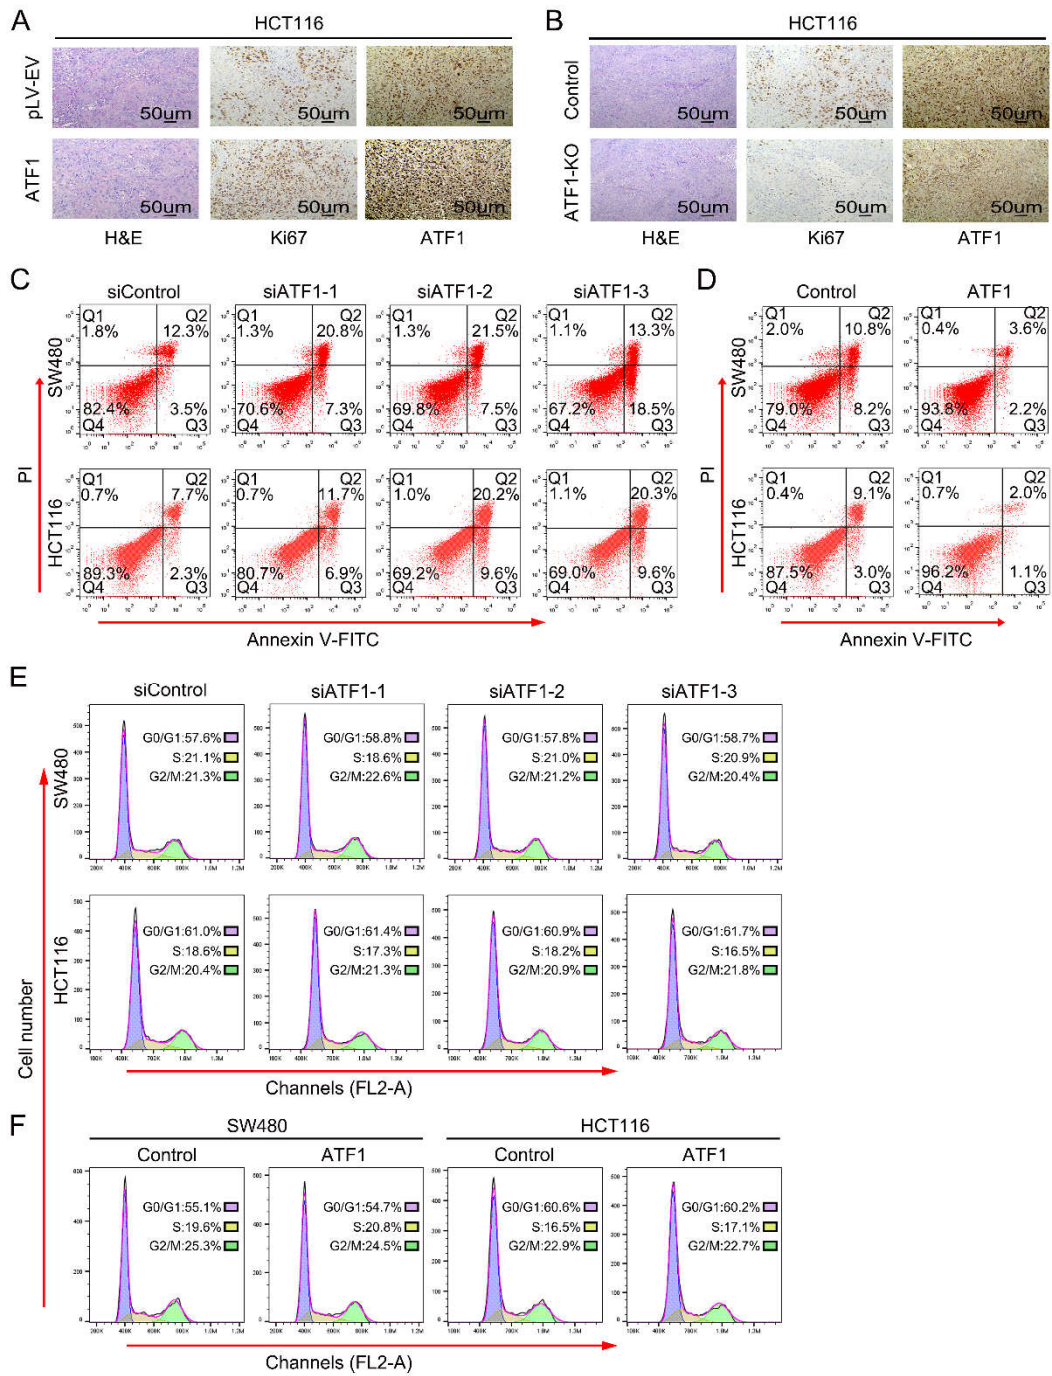

**Figure S2. ATF1 significantly inhibits cell apoptosis, rather than cell cycle. A-B.** Immunohistochemical analysis of xenograft tumor of HCT16 cells treated with ATF1 overexpression (A) or ATF1 knockout (B) in nude mice. Images were a representative result from five replicates in each group. **C-F.** Effect of ATF1 overexpression (C, E) and ATF1 knockdown (D, F) on the apoptosis and cell-cycle process of SW480 and HCT116 cells, respectively. Flow cytometry images were a representative result from three repeated experiments and each with six replicates.

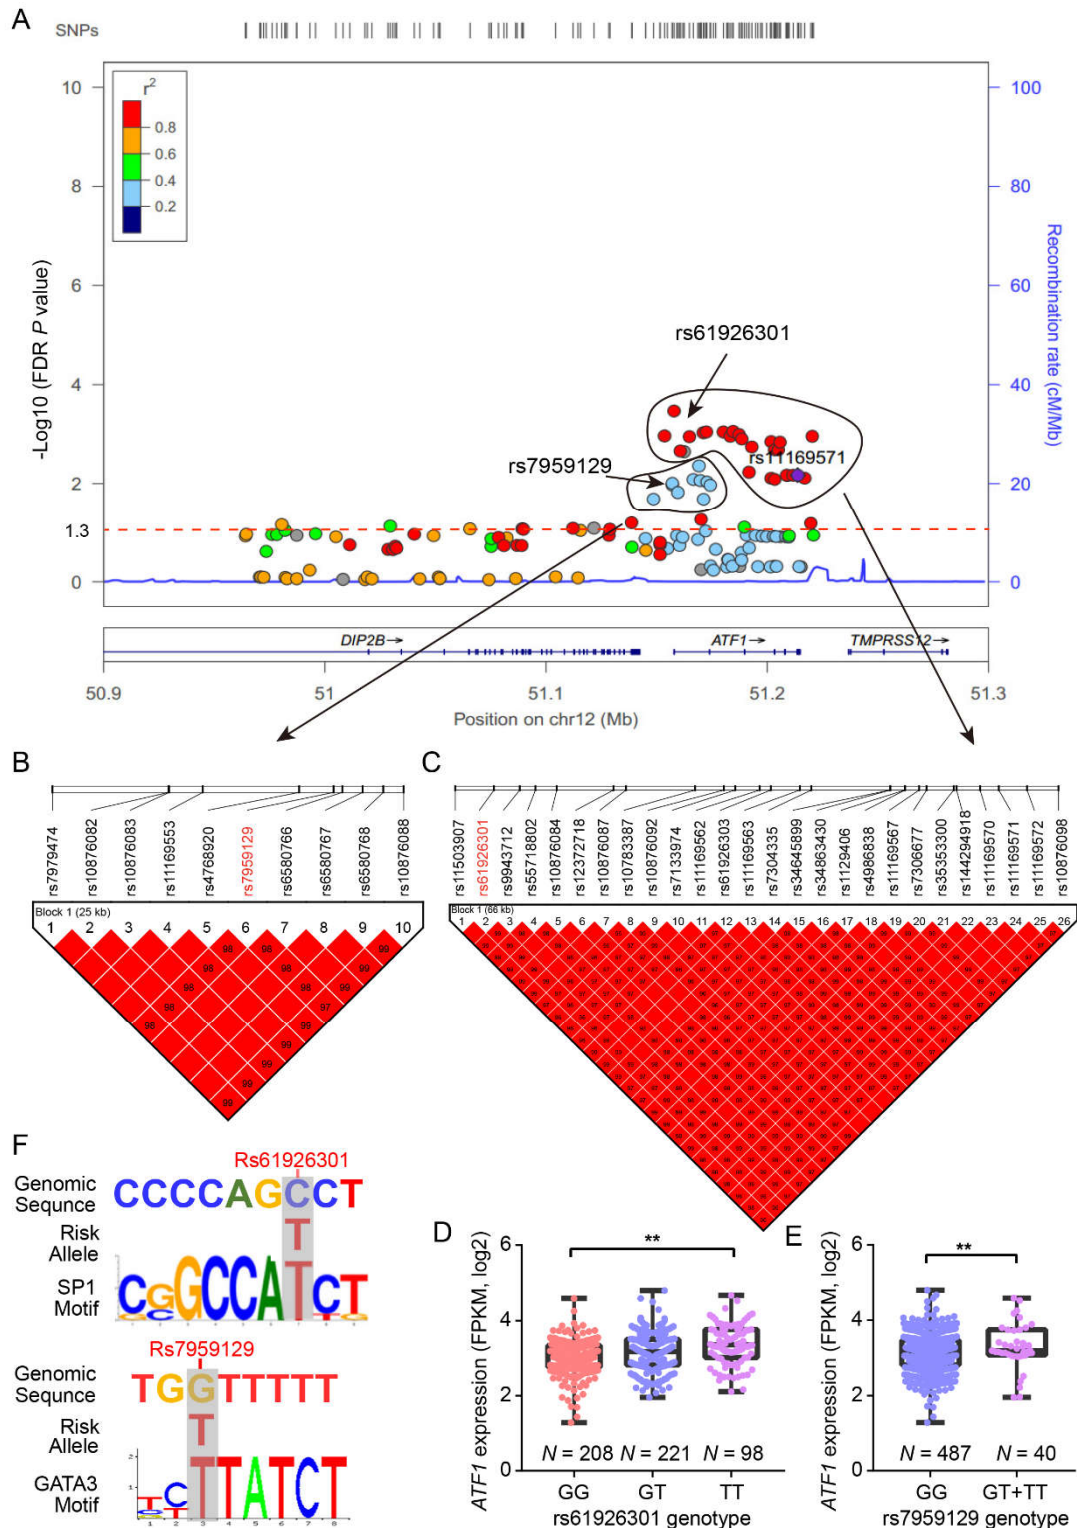

**Figure S3. eQTL analysis between LD SNPs ( $r^2 > 0.2$ ) of tagSNP rs11169571, which is located in the 12q13.12 region, and *ATF1* mRNA expression. **A.** Regional plots of eQTL results and recombination rates of rs11169571 LD SNPs ( $r^2 \geq 0.2$ ) and *ATF1* expression. The eQTL *P* values ( $-\log_{10}$  (FDR *P* values)) of the SNPs (y axis) are presented according to their chromosomal positions (x axis). The genetic recombination rates (cM/Mb) estimated using the 1000 Genomes June 2014 ASN samples are shown**

with a blue line. We annotated the SNPs within the interested region and these SNPs are shown as arrows. The  $r^2$  values of these SNPs with the tag SNP rs11169571 are indicated by different colors. **B, C.** LD block plots ( $r^2 \geq 0.8$ ) showing the  $r^2$  value of SNPs having a significant eQTL with *ATF1* expression. For each plot, the  $r^2$  values between variants were based on the 1000 Genomes June 2014 ASN samples. We selected the most potentially functional variant in each LD block ( $r^2 \geq 0.8$ ), which have been labeled in red, for further population and experimental validation. **D, E.** eQTL results of rs61926301 and rs7959129 genotypes with *ATF1* expression in the TCGA CRC cohort. Data were shown as the mean  $\pm$  SD and  $**P < 0.01$  were calculated by linear regression analysis. **F.** The rs61926301[T] allele resides within a SP1 binding motif and the rs7959129[T] allele resides within a GATA3 binding motif.



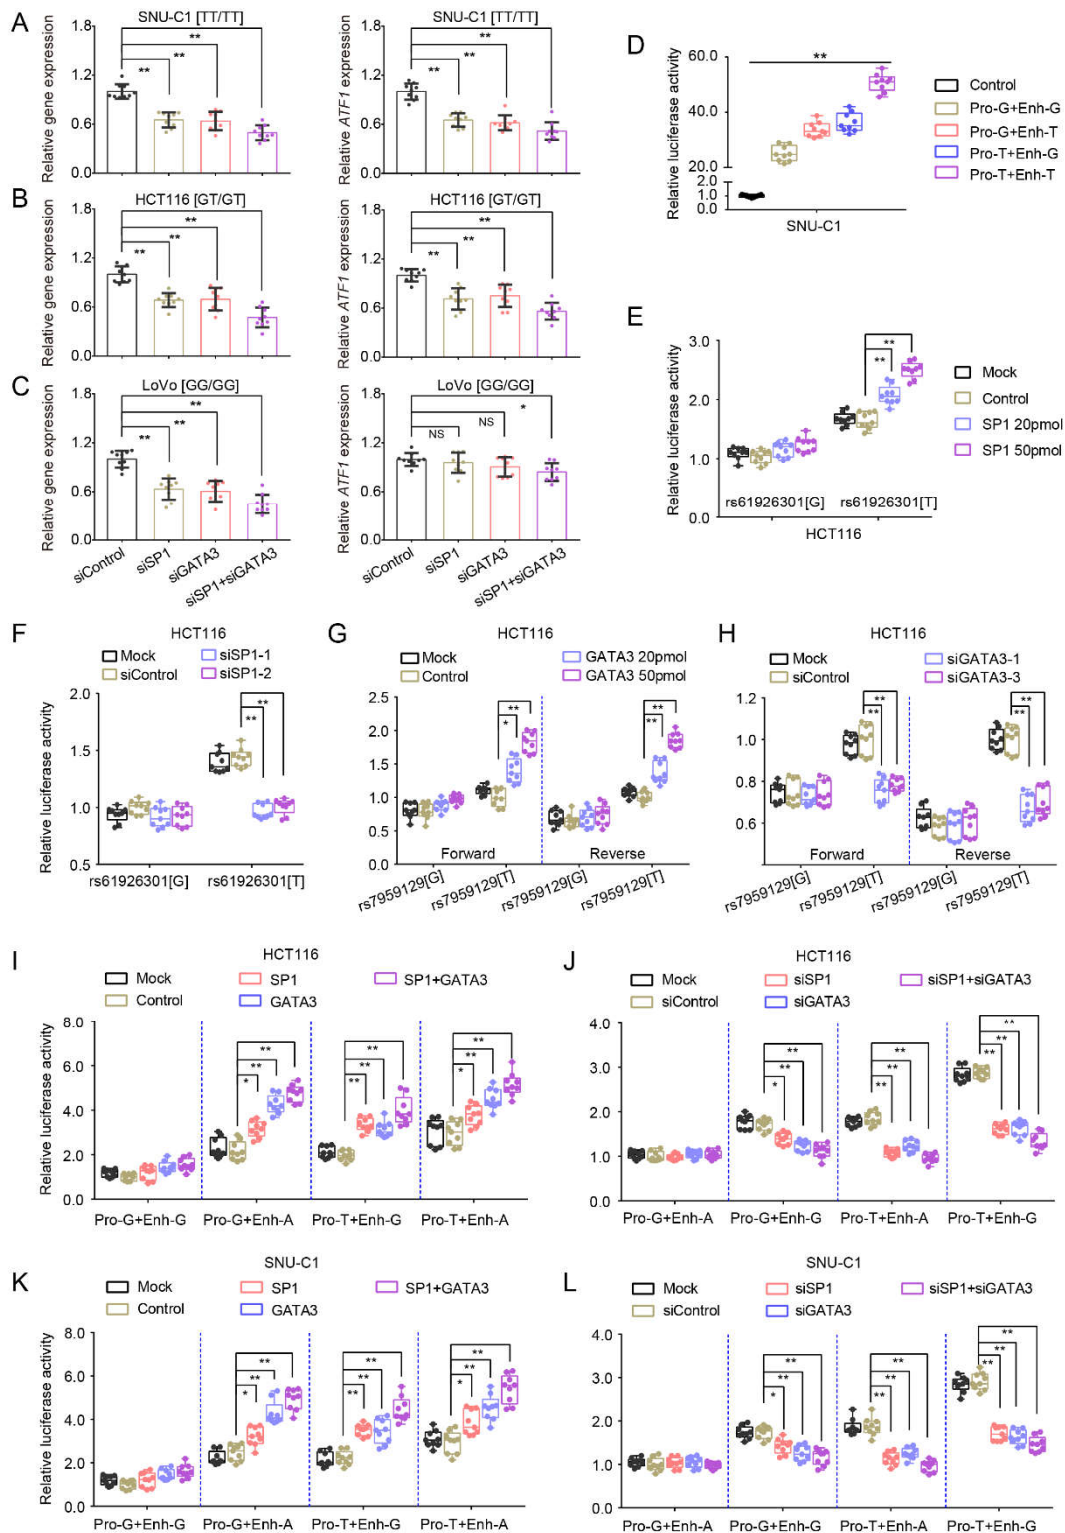

**Figure S4. Risk alleles of rs61926301 and rs7959129 synergistically facilitate ATF1 transcriptional activity mediated by TFs SP1 and GATA1.** **A-C.** The expression of ATF1 when *SP1* or *GATA3* were knocked down in three CRC cell lines (SNU-C1 (A), HCT116 (B), LoVo (C)) with different genotypes of rs61926301 and rs7959129. **D.** Relative reporter gene activity of combined constructs containing both rs61926301 and rs7959129 in SNU-C1 cells. **E, F.** Effect of *SP1* overexpression or *SP1* knockdown on the relative luciferase

activity of constructs containing the rs61926301[G] or rs61926301[T] allele in HCT116 cells. **G, H.** Effect of *GATA3* overexpression or *GATA3* knockdown on the luciferase activity of constructs containing the rs7959129[G] or rs7959129[T] allele in HCT116 cells. **I-L.** Effect of *SP1/GATA3* overexpression or *SP1/GATA3* knockdown on the luciferase activity of combined constructs containing both rs61926301 and rs12424860 in HCT116 and SNU-C1 cells, respectively. All experiments were performed in triplicate and each with three technical replicates. Data were shown as the mean  $\pm$  SD and all  $*P < 0.05$ ,  $**P < 0.01$  were calculated by a two-sided Student's *t*-test.



A

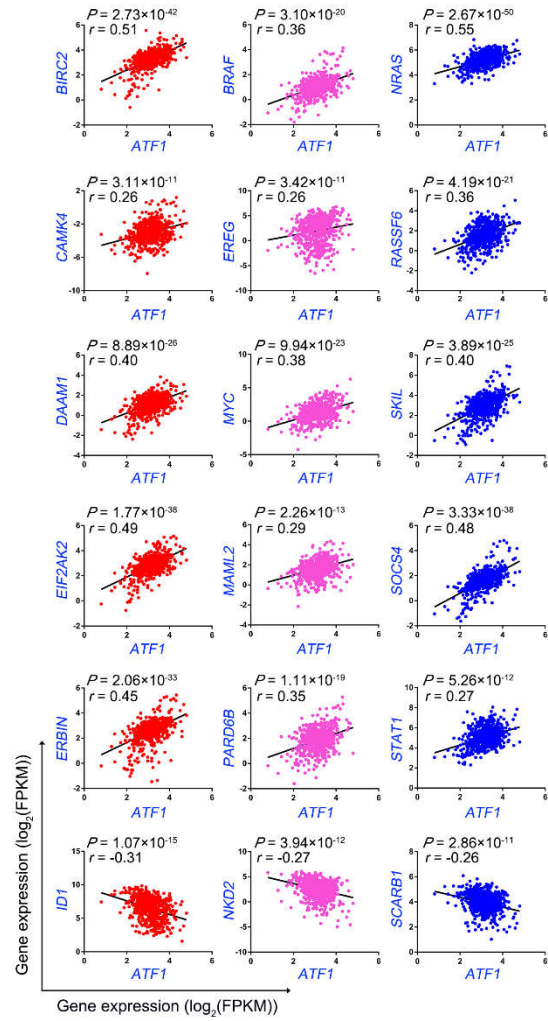

B

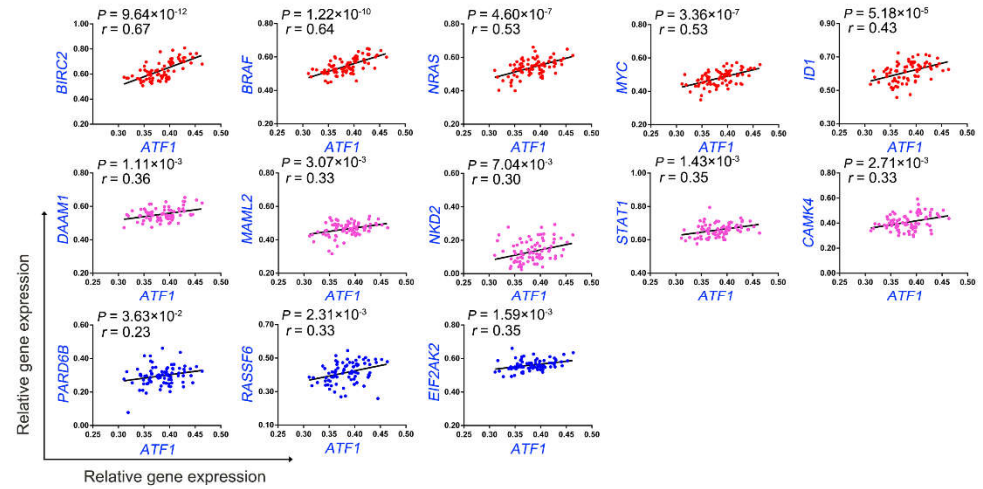

C

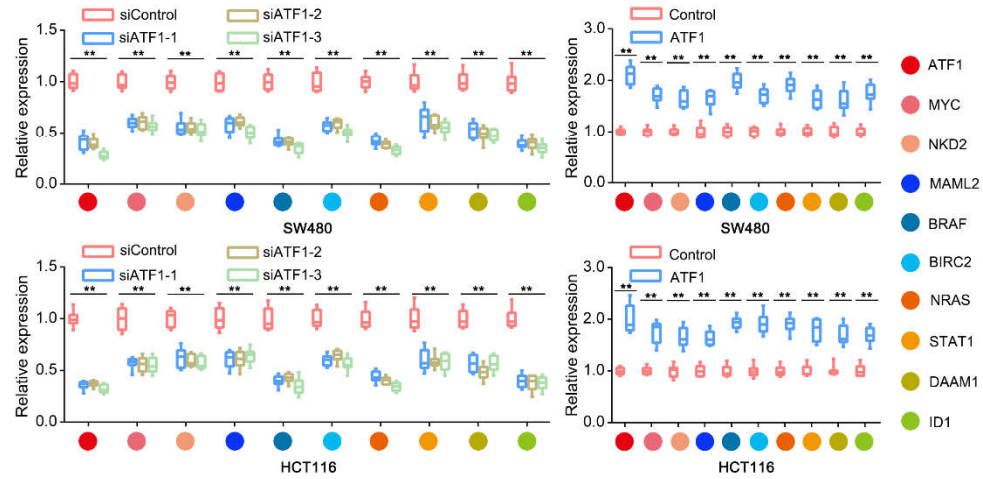

**Figure S5. The correlation between *ATF1* expression and the genes in the top25 pathways of the pathway enrichment analyses in the three independent datasets, including TCGA CRC samples (A), our CRC tissues (B) and CRC cell lines (C).** Gene expression data were normalized to FPKM (fragments per kilobase million) in TCGA samples or to *GAPDH* levels using qRT-PCR in both CRC tissues and CRC cell lines. In TCGA samples or our CRC tissues, all *P* values and *r* values were from Pearson's correlation analysis. In SW480 and HCT116 cells, data were shown as the mean  $\pm$  SD from three repeated experiments and each with triplicates. All \**P* < 0.05, \*\**P* < 0.01 were calculated by a two-sided Student's *t*-test.

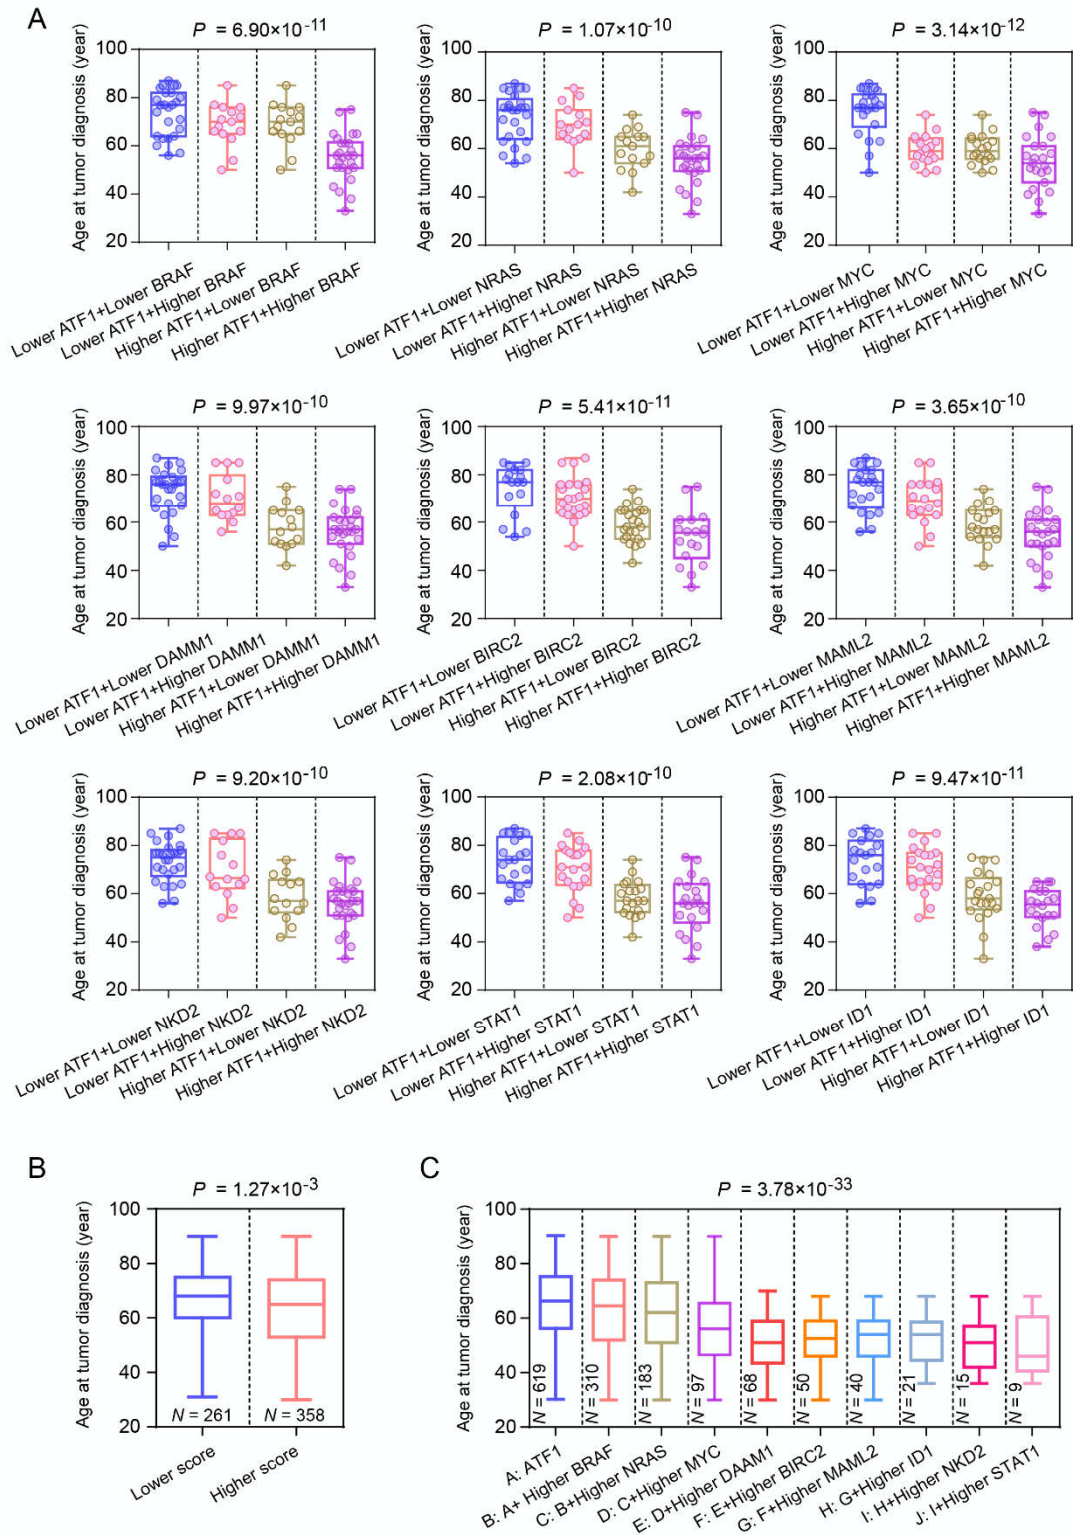

**Figure S6. The association of age at CRC diagnosis with the synergy of *ATF1* and its target genes. A.** The synergy of *ATF1* and its target genes significantly facilitates early-onset of CRC in our CRC patient sets. Data were shown as the mean  $\pm$  SD and all *P* values were calculated by linear regression analysis. **B, C.** The association of age at CRC diagnosis with *ATF1* activity score (B) and with the synergy of *ATF1* and its target genes (C) in the TCGA CRC samples. *ATF1* activity scores were calculated based on the

expression levels of *ATF1* and its target genes. Data were shown as the mean  $\pm$  SD and all *P* values were calculated using linear regression analysis, while this in Figure S6B was calculated by a two-sided Student's *t*-test.

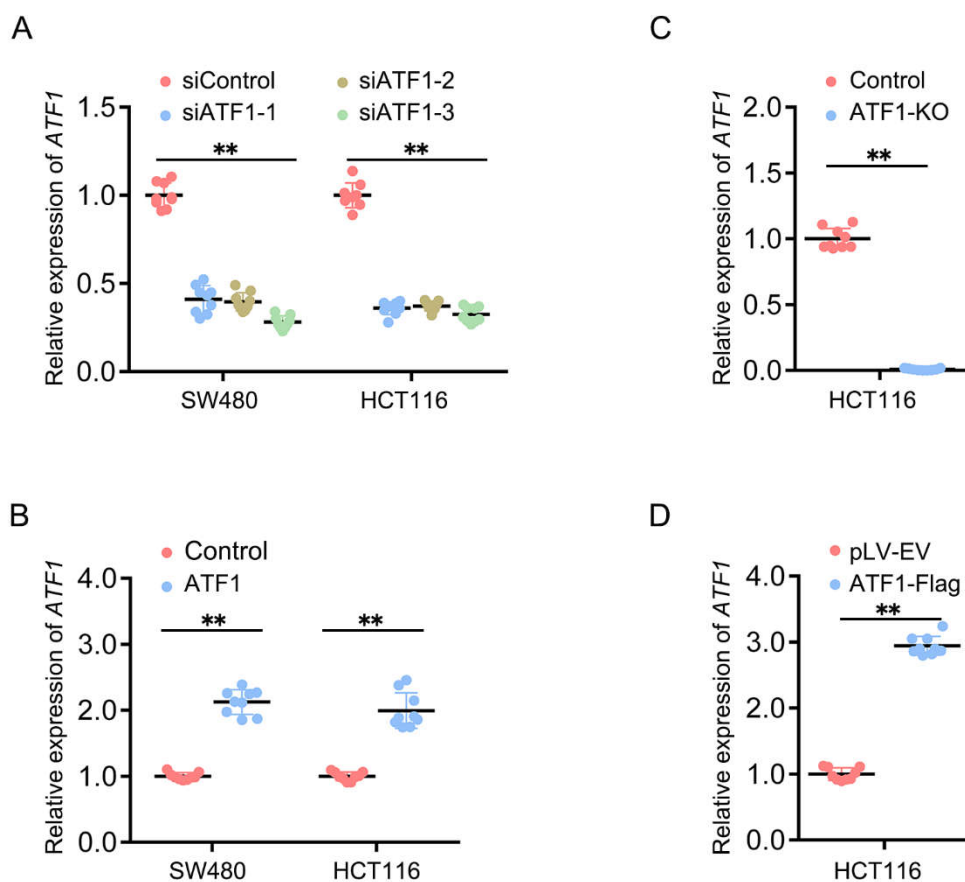

**Figure S7. Determination of the transfection efficiency. A-D.** Relative expression levels of *ATF1* were determined by qRT-PCR method in CRC SW480 and HCT116 cell lines transfected with siControl/siATF1 (A), pcDNA-control/pcDNA-ATF1 (B), ATF1 knockout by CRISPR/cas9 (C) and pLV-EV/ pLV-ATF1 by lentiviral transduction (D). Data were shown as the mean  $\pm$  SD from three repeated experiments and each with three duplicates. All  $*P < 0.05$ ,  $**P < 0.01$  compared with the controls by a two-sided Student's *t*-test.

## Supplemental Tables

Table S1. A collection of tag SNPs in CRC GWAS loci of Asian population ( $P \leq 1.00E-8$ )

| ID | Locus    | Tag SNP    | Allele | Position (hg38) | Nearby gene      | Location   | <i>P</i> value |
|----|----------|------------|--------|-----------------|------------------|------------|----------------|
| 1  | 12p13.32 | rs10774214 | T/C    | 4259186         | <i>CCND2</i>     | Upstream   | 5.48E-10       |
| 2  | 5q31.1   | rs647161   | A/C    | 135163402       | <i>C5ORF66</i>   | Intron     | 3.77E-10       |
| 3  | 20p12.3  | rs2423279  | C/T    | 7831703         | <i>HAO1</i>      | Downstream | 2.29E-07       |
| 4  | 10q26.12 | rs1665650  | T/C    | 116727589       | <i>HSPA12A</i>   | Intron     | 8.58E-07       |
| 5  | 10q22.3  | rs704017   | G/A    | 79059375        | <i>ZMIZ1-AS1</i> | Intron 3   | 2.07E-08       |
| 6  | 10q25.2  | rs11196172 | A/G    | 112967084       | <i>TCF7L2</i>    | Intron 4   | 1.04E-12       |
| 7  | 11q12.2  | rs174537   | G/T    | 61785208        | <i>MYRF</i>      | Intron 24  | 9.22E-21       |
| 7  | 11q12.2  | rs4246215  | G/T    | 61796827        | <i>FEN1</i>      | 3'UTR      | 7.65E-20       |
| 7  | 11q12.2  | rs174550   | T/C    | 61804006        | <i>FADS1</i>     | Intron 7   | 1.58E-19       |
| 7  | 11q12.2  | rs1535     | A/G    | 61830500        | <i>FADS2</i>     | Intron 1   | 8.21E-20       |
| 8  | 12p13.31 | rs10849432 | T/C    | 6276561         | <i>CD9</i>       | Intergenic | 5.81E-10       |
| 9  | 17p13.3  | rs12603526 | C/T    | 897353          | <i>NXN</i>       | Intron 1   | 3.42E-08       |
| 10 | 19q13.2  | rs1800469  | G/A    | 41354391        | <i>TGFB1</i>     | Promoter   | 1.17E-08       |
| 10 | 19q13.2  | rs2241714  | C/T    | 41363487        | <i>B9D2</i>      | Exon 1     | 1.36E-08       |
| 11 | 18q21.1  | rs7229639  | G/A    | 48924606        | <i>SMAD7</i>     | Intron     | 2.93E-11       |
| 11 | 18q21.1  | rs4939827  | T/C    | 48927093        | <i>SMAD7</i>     | Intron 3   | 1.53E-08       |
| 12 | 1q41     | rs6687758  | G/A    | 221991606       | <i>DUSP10</i>    | Intergenic | 8.99E-09       |
| 13 | 8q24.21  | rs10505477 | A/G    | 127395198       | Unknown          | Intergenic | 3.43E-13       |
| 13 | 8q24.21  | rs6983267  | G/T    | 127401060       | Unknown          | Intergenic | 4.85E-14       |
| 13 | 8q24.21  | rs7014346  | A/G    | 127412547       | Unknown          | Intergenic | 1.96E-08       |
| 14 | 10p14    | rs10795668 | G/A    | 8659256         | Unknown          | Intergenic | 4.91E-15       |
| 15 | 12q13.12 | rs11169571 | T/C    | 50819982        | <i>ATF1</i>      | 3'UTR      | 1.65E-12       |

Table S2. Functional genomic screen based on high-throughput RNAi interrogation was used to identify genes essential for cell proliferation in CRC GWAS loci in Asian population in HCT116 and SW480 cells

| Gene              | HCT116      |                  |                   |                                     | SW480       |                  |                   |                                     |
|-------------------|-------------|------------------|-------------------|-------------------------------------|-------------|------------------|-------------------|-------------------------------------|
|                   | Fold change | <i>t</i> P value | Log2(Fold change) | Log10( <i>P</i> value) <sup>†</sup> | Fold change | <i>t</i> P value | Log2(Fold change) | Log10( <i>P</i> value) <sup>†</sup> |
| <b>ATF1</b>       | 0.405       | 9.67E-06         | -1.304            | 5.014                               | 0.550       | 3.71E-05         | -0.862            | 4.430                               |
| <i>PPP1R32</i>    | 0.430       | 9.87E-06         | -1.217            | 5.006                               | 0.584       | 5.26E-04         | -0.776            | 3.279                               |
| <i>RPS19</i>      | 0.544       | 1.55E-04         | -0.879            | 3.810                               | 0.899       | 1.03E-02         | -0.153            | 1.987                               |
| <i>LTBR</i>       | 0.641       | 3.62E-04         | -0.642            | 3.441                               | 0.668       | 2.65E-03         | -0.582            | 2.577                               |
| <i>TFCP2</i>      | 0.652       | 2.67E-04         | -0.617            | 3.573                               | 0.705       | 2.73E-04         | -0.505            | 3.564                               |
| <i>COPS7A</i>     | 0.685       | 2.73E-04         | -0.545            | 3.564                               | 0.823       | 2.64E-02         | -0.281            | 1.578                               |
| <i>NOP2</i>       | 0.686       | 8.45E-04         | -0.544            | 3.073                               | 0.822       | 3.62E-03         | -0.283            | 2.441                               |
| <i>MYC</i>        | 0.689       | 2.27E-03         | -0.538            | 2.643                               | 0.691       | 3.94E-03         | -0.534            | 2.404                               |
| <i>GAPDH</i>      | 0.719       | 2.32E-03         | -0.476            | 2.635                               | 0.850       | 1.77E-02         | -0.235            | 1.752                               |
| <i>CAMLG</i>      | 0.723       | 7.54E-04         | -0.467            | 3.123                               | 0.844       | 5.05E-03         | -0.245            | 2.297                               |
| <i>CHD4</i>       | 0.731       | 2.94E-03         | -0.451            | 2.532                               | 0.769       | 6.18E-03         | -0.379            | 2.209                               |
| <i>CCND2</i>      | 0.736       | 7.55E-04         | -0.443            | 3.122                               | 0.917       | 4.70E-03         | -0.125            | 2.328                               |
| <i>DUSP10</i>     | 0.753       | 1.24E-03         | -0.409            | 2.905                               | 0.811       | 5.67E-03         | -0.302            | 2.247                               |
| <i>SLC11A2</i>    | 0.763       | 2.06E-03         | -0.391            | 2.685                               | 0.891       | 1.11E-03         | -0.167            | 2.956                               |
| <i>LETMD1</i>     | 0.769       | 4.16E-04         | -0.379            | 3.381                               | 0.838       | 2.42E-03         | -0.256            | 2.615                               |
| <i>MYRF</i>       | 0.773       | 4.80E-04         | -0.371            | 3.319                               | 0.841       | 2.73E-03         | -0.250            | 2.564                               |
| <i>FADS3</i>      | 0.776       | 3.63E-04         | -0.365            | 3.440                               | 0.827       | 9.70E-03         | -0.275            | 2.013                               |
| <i>AKAP3</i>      | 0.778       | 2.11E-03         | -0.362            | 2.676                               | 0.870       | 1.25E-02         | -0.201            | 1.904                               |
| <i>SMAGP</i>      | 0.783       | 2.41E-04         | -0.353            | 3.618                               | 0.643       | 8.46E-04         | -0.636            | 3.073                               |
| <i>TMEM138</i>    | 0.785       | 4.24E-04         | -0.350            | 3.372                               | 0.823       | 6.46E-03         | -0.281            | 2.190                               |
| <i>ZNF384</i>     | 0.799       | 2.46E-04         | -0.324            | 3.610                               | 0.897       | 1.12E-02         | -0.157            | 1.952                               |
| <i>VWCE</i>       | 0.802       | 2.09E-03         | -0.318            | 2.681                               | 0.872       | 1.06E-02         | -0.197            | 1.973                               |
| <i>INCENP</i>     | 0.805       | 4.84E-03         | -0.313            | 2.315                               | 0.871       | 2.69E-02         | -0.200            | 1.570                               |
| <i>RAB3IL1</i>    | 0.806       | 3.25E-04         | -0.312            | 3.488                               | 0.788       | 5.41E-05         | -0.343            | 4.267                               |
| <i>SDHAF2</i>     | 0.810       | 1.59E-03         | -0.305            | 2.800                               | 0.851       | 4.09E-03         | -0.233            | 2.388                               |
| <i>CATSPER3</i>   | 0.813       | 5.04E-03         | -0.298            | 2.297                               | 0.927       | 3.46E-02         | -0.110            | 1.461                               |
| <i>SEC24A</i>     | 0.816       | 2.56E-03         | -0.294            | 2.592                               | 0.848       | 4.04E-03         | -0.238            | 2.394                               |
| <i>H2AFY</i>      | 0.820       | 2.06E-03         | -0.287            | 2.687                               | 0.886       | 7.59E-03         | -0.175            | 2.120                               |
| <i>ENO4</i>       | 0.823       | 5.36E-03         | -0.281            | 2.271                               | 0.872       | 3.45E-03         | -0.197            | 2.462                               |
| <i>ING4</i>       | 0.825       | 2.03E-02         | -0.277            | 1.692                               | 1.459       | 6.35E-04         | 0.545             | 3.197                               |
| <i>HSPA12A</i>    | 0.826       | 1.38E-03         | -0.276            | 2.860                               | 0.888       | 4.48E-03         | -0.171            | 2.349                               |
| <i>DAZAP2</i>     | 0.835       | 2.04E-03         | -0.260            | 2.690                               | 0.867       | 1.08E-03         | -0.206            | 2.965                               |
| <i>C5orf66</i>    | 0.838       | 3.71E-03         | -0.256            | 2.430                               | 0.832       | 5.56E-03         | -0.266            | 2.255                               |
| <i>CEACAM6</i>    | 0.852       | 1.07E-02         | -0.231            | 1.969                               | 0.577       | 1.02E-03         | -0.793            | 2.992                               |
| <i>CCDC172</i>    | 0.866       | 7.56E-03         | -0.208            | 2.121                               | 0.864       | 3.46E-02         | -0.210            | 1.461                               |
| <i>NUTM2B-AS1</i> | 0.866       | 2.63E-02         | -0.207            | 1.580                               | 1.480       | 2.96E-04         | 0.566             | 3.529                               |
| <i>PTMS</i>       | 0.868       | 1.91E-02         | -0.205            | 1.719                               | 0.776       | 2.21E-05         | -0.365            | 4.655                               |
| <i>CYP2B6</i>     | 0.870       | 3.89E-03         | -0.201            | 2.410                               | 0.865       | 1.72E-02         | -0.209            | 1.765                               |



|                 |       |          |        |       |       |          |        |       |
|-----------------|-------|----------|--------|-------|-------|----------|--------|-------|
| <i>EXOSC5</i>   | 0.878 | 5.34E-03 | -0.188 | 2.273 | 0.811 | 4.60E-04 | -0.301 | 3.337 |
| <i>DDB1</i>     | 0.885 | 4.22E-02 | -0.176 | 1.374 | 1.274 | 3.63E-03 | 0.350  | 2.440 |
| <i>NCAPD2</i>   | 0.889 | 2.38E-03 | -0.170 | 2.623 | 0.856 | 7.51E-03 | -0.224 | 2.124 |
| <i>DIP2B</i>    | 0.903 | 1.03E-01 | -0.147 | 0.986 | 0.989 | 3.05E-01 | -0.017 | 0.515 |
| <i>PNLIP</i>    | 0.906 | 6.56E-01 | -0.143 | 0.183 | 0.893 | 2.13E-02 | -0.163 | 1.671 |
| <i>TMEM258</i>  | 0.910 | 4.54E-03 | -0.136 | 2.343 | 1.039 | 6.44E-02 | 0.055  | 1.191 |
| <i>PIANP</i>    | 0.911 | 3.96E-02 | -0.135 | 1.403 | 0.936 | 3.47E-02 | -0.095 | 1.460 |
| <i>CYB561A3</i> | 0.913 | 9.45E-03 | -0.132 | 2.025 | 0.913 | 6.82E-02 | -0.131 | 1.166 |
| <i>CPSF7</i>    | 0.914 | 1.27E-02 | -0.130 | 1.896 | 0.959 | 1.36E-01 | -0.061 | 0.868 |
| <i>FAM186A</i>  | 0.916 | 1.69E-01 | -0.126 | 0.772 | 0.962 | 2.33E-01 | -0.056 | 0.633 |
| <i>ACRBP</i>    | 0.917 | 7.31E-03 | -0.125 | 2.136 | 1.028 | 2.91E-01 | 0.040  | 0.536 |
| <i>PCBD2</i>    | 0.930 | 4.58E-02 | -0.104 | 1.339 | 0.860 | 1.75E-02 | -0.218 | 1.756 |
| <i>CEACAM21</i> | 0.931 | 5.17E-02 | -0.103 | 1.286 | 0.894 | 4.91E-04 | -0.161 | 3.309 |
| <i>CCAT1</i>    | 0.935 | 1.73E-01 | -0.097 | 0.763 | 0.829 | 3.45E-04 | -0.271 | 3.462 |
| <i>CSRNP2</i>   | 0.947 | 2.69E-01 | -0.079 | 0.571 | 0.984 | 2.74E-01 | -0.023 | 0.562 |
| <i>NDUFA9</i>   | 0.952 | 2.05E-01 | -0.071 | 0.687 | 0.895 | 1.39E-02 | -0.160 | 1.856 |
| <i>DMRTC2</i>   | 0.953 | 2.60E-01 | -0.069 | 0.586 | 0.943 | 6.47E-02 | -0.085 | 1.189 |
| <i>SFTPA2</i>   | 0.958 | 1.13E-01 | -0.063 | 0.948 | 0.935 | 5.88E-02 | -0.097 | 1.231 |
| <i>POU6F1</i>   | 0.959 | 5.63E-01 | -0.061 | 0.250 | 0.957 | 3.74E-01 | -0.064 | 0.427 |
| <i>BEST1</i>    | 0.961 | 2.15E-01 | -0.058 | 0.667 | 1.009 | 7.41E-01 | 0.013  | 0.130 |
| <i>PPIF</i>     | 0.966 | 2.74E-01 | -0.050 | 0.562 | 1.016 | 2.48E-01 | 0.024  | 0.606 |
| <i>FADS1</i>    | 0.973 | 1.59E-01 | -0.040 | 0.800 | 0.954 | 6.71E-02 | -0.068 | 1.173 |
| <i>HIGD1C</i>   | 0.974 | 2.95E-01 | -0.038 | 0.530 | 0.985 | 1.14E-01 | -0.022 | 0.943 |
| <i>GALNT8</i>   | 0.978 | 5.74E-01 | -0.032 | 0.241 | 0.903 | 6.26E-02 | -0.147 | 1.204 |
| <i>KCNK18</i>   | 0.979 | 8.26E-01 | -0.030 | 0.083 | 0.965 | 3.05E-01 | -0.052 | 0.516 |
| <i>ATP5SL</i>   | 0.983 | 5.66E-01 | -0.025 | 0.247 | 0.989 | 7.18E-01 | -0.016 | 0.144 |
| <i>EIF5AL1</i>  | 0.986 | 5.79E-01 | -0.021 | 0.237 | 0.945 | 1.02E-01 | -0.081 | 0.990 |
| <i>NEUROG1</i>  | 0.987 | 6.27E-01 | -0.018 | 0.203 | 1.009 | 7.86E-01 | 0.013  | 0.105 |
| <i>TMPRSS12</i> | 0.989 | 6.42E-01 | -0.016 | 0.193 | 0.996 | 4.35E-01 | -0.006 | 0.361 |
| <i>FGF6</i>     | 0.989 | 7.32E-01 | -0.015 | 0.135 | 0.940 | 4.66E-02 | -0.090 | 1.332 |
| <i>CEACAM3</i>  | 0.991 | 8.27E-01 | -0.012 | 0.082 | 0.974 | 2.21E-01 | -0.038 | 0.656 |
| <i>VWF</i>      | 1.001 | 9.38E-01 | 0.002  | 0.028 | 1.025 | 2.30E-01 | 0.036  | 0.639 |
| <i>LRRC10B</i>  | 1.001 | 9.70E-01 | 0.002  | 0.013 | 1.023 | 2.21E-01 | 0.033  | 0.656 |
| <i>FADS2</i>    | 1.012 | 5.20E-01 | 0.017  | 0.284 | 1.212 | 6.94E-03 | 0.277  | 2.159 |
| <i>GEMIN4</i>   | 1.012 | 5.83E-01 | 0.018  | 0.234 | 0.906 | 3.08E-02 | -0.142 | 1.511 |
| <i>SCGB2A2</i>  | 1.015 | 5.64E-01 | 0.021  | 0.248 | 1.007 | 6.06E-01 | 0.010  | 0.218 |
| <i>SMAD7</i>    | 1.017 | 6.62E-01 | 0.024  | 0.179 | 0.880 | 4.30E-03 | -0.185 | 2.366 |
| <i>DAK</i>      | 1.017 | 4.87E-01 | 0.024  | 0.313 | 0.998 | 9.42E-01 | -0.003 | 0.026 |
| <i>ZCCHC24</i>  | 1.017 | 5.49E-01 | 0.024  | 0.261 | 1.055 | 3.68E-02 | 0.078  | 1.434 |
| <i>CCDC97</i>   | 1.017 | 6.37E-01 | 0.024  | 0.196 | 0.941 | 9.36E-02 | -0.088 | 1.029 |
| <i>C12orf4</i>  | 1.017 | 6.81E-01 | 0.025  | 0.167 | 1.016 | 6.59E-01 | 0.023  | 0.181 |
| <i>C10orf82</i> | 1.023 | 2.82E-01 | 0.033  | 0.550 | 0.896 | 4.12E-03 | -0.158 | 2.385 |
| <i>VPS53</i>    | 1.025 | 4.24E-01 | 0.035  | 0.373 | 0.986 | 7.43E-02 | -0.020 | 1.129 |
| <i>SCNN1A</i>   | 1.027 | 4.48E-01 | 0.039  | 0.349 | 0.950 | 8.97E-02 | -0.074 | 1.047 |

|                 |       |          |       |       |       |          |        |       |
|-----------------|-------|----------|-------|-------|-------|----------|--------|-------|
| <i>CEACAM5</i>  | 1.028 | 2.18E-01 | 0.039 | 0.661 | 1.014 | 6.07E-01 | 0.020  | 0.217 |
| <i>FEN1</i>     | 1.028 | 1.76E-01 | 0.040 | 0.755 | 1.081 | 5.67E-02 | 0.113  | 1.246 |
| <i>DDX46</i>    | 1.029 | 2.75E-01 | 0.041 | 0.561 | 0.964 | 2.37E-01 | -0.053 | 0.624 |
| <i>TXNDC15</i>  | 1.029 | 3.00E-01 | 0.041 | 0.523 | 1.176 | 1.31E-03 | 0.234  | 2.883 |
| <i>LPAR5</i>    | 1.031 | 5.43E-01 | 0.044 | 0.265 | 1.067 | 4.78E-02 | 0.094  | 1.321 |
| <i>CEACAM4</i>  | 1.033 | 3.20E-01 | 0.047 | 0.495 | 0.933 | 7.16E-02 | -0.100 | 1.145 |
| <i>ZMIZ1</i>    | 1.037 | 1.67E-01 | 0.053 | 0.778 | 1.016 | 2.07E-01 | 0.023  | 0.683 |
| <i>B9D2</i>     | 1.042 | 1.53E-01 | 0.059 | 0.815 | 0.927 | 6.82E-02 | -0.109 | 1.166 |
| <i>CYP2A13</i>  | 1.045 | 3.32E-01 | 0.063 | 0.479 | 0.911 | 5.31E-02 | -0.134 | 1.275 |
| <i>PNLIPRP2</i> | 1.046 | 1.68E-01 | 0.064 | 0.774 | 0.905 | 4.01E-02 | -0.143 | 1.396 |
| <i>DYM</i>      | 1.047 | 2.40E-01 | 0.066 | 0.620 | 1.198 | 1.37E-03 | 0.260  | 2.864 |
| <i>SCGB2A1</i>  | 1.051 | 8.06E-02 | 0.072 | 1.094 | 0.962 | 1.28E-01 | -0.055 | 0.891 |
| <i>SCGB1D2</i>  | 1.052 | 4.43E-02 | 0.073 | 1.354 | 0.997 | 8.20E-01 | -0.004 | 0.086 |
| <i>TAPBPL</i>   | 1.054 | 2.01E-01 | 0.075 | 0.697 | 0.881 | 3.99E-02 | -0.183 | 1.399 |
| <i>PNLIPRP1</i> | 1.054 | 8.09E-02 | 0.076 | 1.092 | 1.009 | 6.81E-01 | 0.013  | 0.167 |
| <i>B3GNT8</i>   | 1.060 | 1.32E-01 | 0.084 | 0.880 | 1.040 | 1.57E-01 | 0.057  | 0.803 |
| <i>C12orf5</i>  | 1.063 | 2.04E-01 | 0.088 | 0.691 | 0.987 | 5.25E-01 | -0.018 | 0.280 |
| <i>SYT7</i>     | 1.063 | 4.61E-02 | 0.088 | 1.336 | 0.969 | 5.44E-02 | -0.045 | 1.265 |
| <i>ABR</i>      | 1.066 | 1.38E-01 | 0.092 | 0.861 | 1.075 | 1.38E-01 | 0.105  | 0.861 |
| <i>PARP11</i>   | 1.067 | 6.32E-02 | 0.094 | 1.200 | 0.973 | 2.34E-01 | -0.040 | 0.631 |
| <i>TMEM91</i>   | 1.070 | 1.25E-01 | 0.097 | 0.904 | 0.900 | 4.79E-02 | -0.151 | 1.319 |
| <i>MLF2</i>     | 1.073 | 4.51E-02 | 0.101 | 1.346 | 1.168 | 9.33E-03 | 0.224  | 2.030 |
| <i>CYP2A7</i>   | 1.074 | 6.05E-02 | 0.103 | 1.218 | 0.824 | 8.95E-04 | -0.279 | 3.048 |
| <i>VAMP1</i>    | 1.076 | 9.11E-02 | 0.105 | 1.041 | 1.142 | 2.36E-02 | 0.191  | 1.627 |
| <i>VTI1A</i>    | 1.077 | 6.62E-02 | 0.106 | 1.179 | 1.254 | 2.95E-02 | 0.327  | 1.530 |
| <i>CEACAM7</i>  | 1.077 | 1.06E-01 | 0.107 | 0.973 | 1.037 | 1.69E-01 | 0.052  | 0.772 |
| <i>SCGB1D1</i>  | 1.079 | 2.58E-02 | 0.110 | 1.588 | 1.029 | 3.02E-01 | 0.041  | 0.520 |
| <i>C5orf24</i>  | 1.080 | 3.02E-02 | 0.111 | 1.519 | 0.933 | 1.51E-02 | -0.100 | 1.820 |
| <i>VAX1</i>     | 1.088 | 3.99E-01 | 0.122 | 0.400 | 0.976 | 1.06E-01 | -0.034 | 0.975 |
| <i>IFFO1</i>    | 1.090 | 3.16E-02 | 0.125 | 1.501 | 1.042 | 3.17E-01 | 0.059  | 0.498 |
| <i>BCKDHA</i>   | 1.091 | 5.00E-03 | 0.126 | 2.301 | 0.830 | 1.45E-02 | -0.269 | 1.839 |
| <i>CTIF</i>     | 1.094 | 1.10E-01 | 0.129 | 0.959 | 1.067 | 5.33E-02 | 0.094  | 1.274 |
| <i>TCF7L2</i>   | 1.094 | 1.40E-02 | 0.130 | 1.855 | 0.747 | 2.33E-03 | -0.421 | 2.632 |
| <i>YWHAE</i>    | 1.096 | 1.92E-02 | 0.132 | 1.716 | 1.100 | 5.93E-02 | 0.137  | 1.227 |
| <i>DYRK4</i>    | 1.098 | 1.75E-02 | 0.135 | 1.758 | 0.938 | 4.92E-02 | -0.093 | 1.308 |
| <i>GFRA1</i>    | 1.098 | 2.14E-02 | 0.136 | 1.670 | 0.979 | 3.54E-01 | -0.030 | 0.451 |
| <i>AXL</i>      | 1.099 | 1.89E-02 | 0.136 | 1.724 | 1.172 | 3.72E-03 | 0.229  | 2.429 |
| <i>C19orf69</i> | 1.121 | 6.38E-03 | 0.165 | 2.195 | 1.162 | 2.50E-02 | 0.216  | 1.603 |
| <i>PLEKHG6</i>  | 1.121 | 3.12E-03 | 0.165 | 2.506 | 1.200 | 6.93E-03 | 0.263  | 2.159 |
| <i>HAO1</i>     | 1.127 | 8.12E-03 | 0.172 | 2.090 | 1.177 | 3.79E-03 | 0.236  | 2.421 |
| <i>CYP2F1</i>   | 1.127 | 1.40E-02 | 0.173 | 1.853 | 1.198 | 1.99E-02 | 0.261  | 1.701 |
| <i>CXCL14</i>   | 1.131 | 3.01E-02 | 0.178 | 1.521 | 1.572 | 1.38E-04 | 0.653  | 3.862 |
| <i>TIMM22</i>   | 1.132 | 3.67E-02 | 0.179 | 1.435 | 1.456 | 9.53E-04 | 0.542  | 3.021 |
| <i>METTL7A</i>  | 1.134 | 7.73E-03 | 0.182 | 2.112 | 1.232 | 1.99E-03 | 0.302  | 2.701 |

|                 |       |          |       |       |       |          |        |       |
|-----------------|-------|----------|-------|-------|-------|----------|--------|-------|
| <i>TNFRSF1A</i> | 1.137 | 8.32E-04 | 0.186 | 3.080 | 1.287 | 2.12E-03 | 0.364  | 2.673 |
| <i>CD27</i>     | 1.151 | 6.38E-03 | 0.203 | 2.195 | 1.188 | 4.13E-03 | 0.248  | 2.385 |
| <i>RAD51AP1</i> | 1.152 | 5.77E-03 | 0.204 | 2.239 | 1.216 | 4.82E-03 | 0.282  | 2.317 |
| <i>KIAA1598</i> | 1.152 | 1.94E-03 | 0.204 | 2.712 | 1.145 | 8.76E-03 | 0.196  | 2.058 |
| <i>CYP2S1</i>   | 1.155 | 1.38E-02 | 0.208 | 1.861 | 1.156 | 9.17E-03 | 0.209  | 2.038 |
| <i>HNRNPUL1</i> | 1.155 | 9.62E-03 | 0.208 | 2.017 | 1.197 | 9.19E-03 | 0.260  | 2.037 |
| <i>TGFB1</i>    | 1.157 | 7.89E-03 | 0.211 | 2.103 | 1.185 | 6.65E-03 | 0.245  | 2.177 |
| <i>POU5F1B</i>  | 1.159 | 1.04E-02 | 0.213 | 1.985 | 1.220 | 7.10E-03 | 0.287  | 2.149 |
| <i>TIFAB</i>    | 1.162 | 3.56E-03 | 0.217 | 2.448 | 1.187 | 2.53E-02 | 0.247  | 1.597 |
| <i>GLOD4</i>    | 1.163 | 2.59E-02 | 0.218 | 1.587 | 1.479 | 1.99E-04 | 0.564  | 3.700 |
| <i>PITX1</i>    | 1.173 | 3.31E-03 | 0.230 | 2.481 | 1.144 | 1.02E-02 | 0.194  | 1.992 |
| <i>TMX4</i>     | 1.186 | 1.73E-03 | 0.246 | 2.762 | 1.112 | 3.36E-02 | 0.153  | 1.473 |
| <i>SCGB1D4</i>  | 1.188 | 1.93E-02 | 0.249 | 1.715 | 1.113 | 1.72E-02 | 0.154  | 1.765 |
| <i>DAGLA</i>    | 1.192 | 6.27E-03 | 0.254 | 2.203 | 1.215 | 3.49E-02 | 0.281  | 1.457 |
| <i>RNMTL1</i>   | 1.193 | 2.96E-03 | 0.254 | 2.528 | 1.213 | 1.17E-02 | 0.278  | 1.931 |
| <i>LYPD4</i>    | 1.194 | 4.13E-05 | 0.256 | 4.384 | 1.179 | 1.01E-03 | 0.238  | 2.995 |
| <i>ANO2</i>     | 1.196 | 2.10E-04 | 0.258 | 3.679 | 1.249 | 2.22E-03 | 0.320  | 2.654 |
| <i>FGF23</i>    | 1.226 | 5.23E-03 | 0.294 | 2.281 | 1.206 | 2.03E-02 | 0.271  | 1.692 |
| <i>LARP4</i>    | 1.234 | 1.01E-03 | 0.304 | 2.994 | 1.126 | 1.33E-02 | 0.171  | 1.875 |
| <i>TUSC5</i>    | 1.240 | 5.64E-03 | 0.311 | 2.249 | 0.821 | 7.84E-04 | -0.285 | 3.106 |
| <i>LAG3</i>     | 1.247 | 5.13E-03 | 0.318 | 2.290 | 1.211 | 1.14E-02 | 0.276  | 1.942 |
| <i>FTH1</i>     | 1.273 | 5.83E-03 | 0.349 | 2.235 | 1.207 | 2.24E-02 | 0.271  | 1.650 |
| <i>CD9</i>      | 1.278 | 4.93E-03 | 0.354 | 2.307 | 1.157 | 1.73E-02 | 0.210  | 1.762 |
| <i>NXN</i>      | 1.313 | 3.28E-03 | 0.393 | 2.485 | 1.260 | 1.29E-02 | 0.333  | 1.890 |
| <i>TMEM216</i>  | 1.318 | 3.56E-03 | 0.399 | 2.448 | 1.204 | 9.12E-03 | 0.267  | 2.040 |
| <i>PLCB1</i>    | 1.323 | 2.55E-03 | 0.404 | 2.593 | 1.223 | 1.12E-02 | 0.290  | 1.952 |
| <i>FAM57A</i>   | 1.327 | 1.57E-03 | 0.408 | 2.805 | 1.126 | 2.86E-02 | 0.172  | 1.544 |
| <i>BIN2</i>     | 1.339 | 1.46E-03 | 0.422 | 2.837 | 1.156 | 3.78E-02 | 0.210  | 1.422 |
| <i>MRPL51</i>   | 1.367 | 1.49E-03 | 0.451 | 2.828 | 1.328 | 2.99E-04 | 0.409  | 3.525 |
| <i>DCANP1</i>   | 1.526 | 6.19E-04 | 0.610 | 3.208 | 1.178 | 1.04E-03 | 0.236  | 2.983 |
| <i>PNLIPRP3</i> | 1.583 | 6.15E-04 | 0.663 | 3.211 | 1.411 | 9.70E-04 | 0.496  | 3.013 |

<sup>†</sup>All *P* values were calculated by a two-sided Student's *t*-test

Table S3. Summary of characteristics of individuals in the two stage case-control studies

|                  | Discovery phase       |                          |                        | Replication phase     |                          |                       | Combined study        |                          |                       |
|------------------|-----------------------|--------------------------|------------------------|-----------------------|--------------------------|-----------------------|-----------------------|--------------------------|-----------------------|
|                  | Cases<br><i>N</i> (%) | Controls<br><i>N</i> (%) | <i>P</i> <sup>†</sup>  | Cases<br><i>N</i> (%) | Controls<br><i>N</i> (%) | <i>P</i> <sup>†</sup> | Cases<br><i>N</i> (%) | Controls<br><i>N</i> (%) | <i>P</i> <sup>†</sup> |
| Total            | 1,524                 | 1,522                    |                        | 4,689                 | 8,866                    |                       | 6,213                 | 10,388                   |                       |
| Gender           |                       |                          | 0.498                  |                       |                          | 0.631                 |                       |                          | 0.429                 |
| Male             | 923 (60.56)           | 940 (61.76)              |                        | 2,879 (61.40)         | 5,481 (61.82)            |                       | 3,802 (61.19)         | 6,421 (61.81)            |                       |
| Female           | 601 (39.44)           | 582 (38.24)              |                        | 1,810 (38.60)         | 3,385 (38.18)            |                       | 2,411 (38.81)         | 3,967 (38.19)            |                       |
| Age (mean ± SD)  | 58.84±11.86           | 60.48±10.11              | <0.001                 | 59.73±12.06           | 61.33±11.57              | <0.001                | 59.51±12.02           | 61.20±11.37              | <0.001                |
| Age group (year) |                       |                          | 0.041                  |                       |                          | 0.937                 |                       |                          | 0.201                 |
| ≤50              | 327 (21.46)           | 281 (18.46)              |                        | 708 (15.10)           | 1,321 (14.90)            |                       | 1,035 (16.66)         | 1,602 (15.42)            |                       |
| 51-60            | 420 (27.56)           | 433 (28.45)              |                        | 1,263 (26.94)         | 2,396 (27.02)            |                       | 1,683 (27.09)         | 2,829 (27.23)            |                       |
| 61-70            | 484 (31.76)           | 542 (35.61)              |                        | 1,602 (34.17)         | 3,001 (33.85)            |                       | 2,086 (33.57)         | 3,543 (34.11)            |                       |
| ≥71              | 293 (19.23)           | 266 (17.48)              |                        | 1,116 (23.80)         | 2,148 (24.23)            |                       | 1,409 (22.68)         | 2,414 (23.24)            |                       |
| Smoking status   |                       |                          | 1.32×10 <sup>-10</sup> |                       |                          | 0.011                 |                       |                          | 6.57×10 <sup>-4</sup> |
| No               | 1042 (68.37)          | 1197 (78.65)             |                        | 2,834 (60.44)         | 5,556 (62.67)            |                       | 3,876 (62.39)         | 6,753 (65.01)            |                       |
| Yes              | 482 (31.63)           | 325 (21.35)              |                        | 1,855 (39.56)         | 3,310 (37.33)            |                       | 2,337 (37.61)         | 3,635 (34.99)            |                       |
| Drinking status  |                       |                          | 0.725                  |                       |                          | 0.159                 |                       |                          | 0.092                 |
| No               | 1133 (74.34)          | 1123 (73.78)             |                        | 3,414 (72.81)         | 6,354 (71.67)            |                       | 4,547 (73.19)         | 7,477 (71.98)            |                       |
| Yes              | 391 (25.66)           | 399 (26.22)              |                        | 1,275 (27.19)         | 2,512 (28.33)            |                       | 1,666 (26.81)         | 2,911 (28.02)            |                       |

SD, standard deviation.

<sup>†</sup>All *P* values were calculated by a two sided Student's *t* test for age or the Pearson's  $\chi^2$  test for gender, age group, smoking status, and drinking status.

Table S4. Interaction analysis between *ATF1* promoter-rs61926301 and enhancer-rs7959129 in the risk of CRC

| Stage             | Interaction analysis                            |                                           | Stratified analysis | Enhancer rs7959129 |                  |                       |                 |                  |                        |                 |                  |                        |
|-------------------|-------------------------------------------------|-------------------------------------------|---------------------|--------------------|------------------|-----------------------|-----------------|------------------|------------------------|-----------------|------------------|------------------------|
|                   |                                                 |                                           |                     | GG                 |                  |                       | GT              |                  |                        | TT              |                  |                        |
|                   | <sup>†</sup> <i>P</i> <sub>multiplicative</sub> | <sup>#</sup> <i>P</i> <sub>additive</sub> | Promoter rs61926301 | Cases/ Controls    | OR(95%CI)        | <i>P</i> <sup>†</sup> | Cases/ Controls | OR(95%CI)        | <i>P</i> <sup>†</sup>  | Cases/ Controls | OR(95%CI)        | <i>P</i> <sup>†</sup>  |
| Discovery phase   | 8.20×10 <sup>-7</sup>                           | 1.04×10 <sup>-3</sup>                     | GG                  | 176/331            | 1.00 (Reference) |                       | 259/212         | 2.21 (1.70-2.89) | 2.76×10 <sup>-9</sup>  | 102/97          | 1.92 (1.37-2.70) | 1.55×10 <sup>-4</sup>  |
|                   |                                                 |                                           | GT                  | 268/264            | 1.83 (1.42-2.36) | 2.62×10 <sup>-6</sup> | 396/357         | 2.02 (1.59-2.56) | 6.03×10 <sup>-9</sup>  | 122/90          | 2.41 (1.73-3.37) | 2.54×10 <sup>-7</sup>  |
|                   |                                                 |                                           | TT                  | 51/28              | 3.30 (2.00-5.46) | 3.03×10 <sup>-6</sup> | 92/85           | 1.93 (1.35-2.75) | 2.76×10 <sup>-4</sup>  | 34/16           | 3.63 (1.94-6.79) | 5.43×10 <sup>-5</sup>  |
| Replication phase | 3.47×10 <sup>-15</sup>                          | 1.12×10 <sup>-4</sup>                     | GG                  | 768/1,579          | 1.00 (Reference) |                       | 1,025/2,116     | 0.98 (0.87-1.10) | 6.94×10 <sup>-1</sup>  | 340/694         | 1.03 (0.88-1.21) | 6.68×10 <sup>-1</sup>  |
|                   |                                                 |                                           | GT                  | 749/1,678          | 0.92 (0.81-1.04) | 1.68×10 <sup>-1</sup> | 941/1,448       | 1.34 (1.19-1.51) | 1.72×10 <sup>-6</sup>  | 313/441         | 1.47 (1.24-1.75) | 7.54×10 <sup>-6</sup>  |
|                   |                                                 |                                           | TT                  | 169/326            | 1.06 (0.87-1.31) | 5.56×10 <sup>-1</sup> | 242/401         | 1.25 (1.04-1.50) | 1.73×10 <sup>-2</sup>  | 142/183         | 1.64 (1.29-2.08) | 5.37×10 <sup>-5</sup>  |
| Combined study    | 1.20×10 <sup>-22</sup>                          | 6.50×10 <sup>-3</sup>                     | GG                  | 944/1,910          | 1.00 (Reference) |                       | 1,284/2,328     | 1.09 (0.98-1.21) | 1.15×10 <sup>-1</sup>  | 442/791         | 1.15 (1.00-1.32) | 5.72×10 <sup>-2</sup>  |
|                   |                                                 |                                           | GT                  | 1,017/1,942        | 1.06 (0.95-1.18) | 3.11×10 <sup>-1</sup> | 1,337/1,805     | 1.49 (1.34-1.66) | 1.52×10 <sup>-13</sup> | 435/531         | 1.65 (1.42-1.91) | 6.70×10 <sup>-11</sup> |
|                   |                                                 |                                           | TT                  | 220/354            | 1.25 (1.04-1.51) | 1.71×10 <sup>-2</sup> | 334/486         | 1.39 (1.18-1.63) | 6.65×10 <sup>-5</sup>  | 176/199         | 1.77 (1.42-2.21) | 3.16×10 <sup>-7</sup>  |

Abbreviation: Odds ratios (ORs), Confidence intervals (CIs).

<sup>†</sup>*P* values were calculated by unconditional logistic regression model after adjusting for gender, age group, smoking status and drinking status.

<sup>#</sup>*P* values in additive interaction model were calculated by the bootstrapping test of goodness-of-fit.

Table S5. Combined ChIP-seq and RNA-seq data reveals 278 genes directly regulated by *ATF1*

| Gene            | <i>ATF1</i> group<br>(mean, FPKM) | Control group<br>(mean, FPKM) | log2 (Fold<br>change) | $t$ FDR <i>P</i><br>value |
|-----------------|-----------------------------------|-------------------------------|-----------------------|---------------------------|
| <i>CD109</i>    | 1.287                             | 0.225                         | 2.516                 | 7.00E-03                  |
| <i>CREB5</i>    | 1.746                             | 0.423                         | 2.045                 | 7.00E-03                  |
| <i>AKT3</i>     | 3.802                             | 0.930                         | 2.031                 | 7.00E-03                  |
| <i>PRL</i>      | 7.786                             | 2.003                         | 1.959                 | 7.00E-03                  |
| <i>BICC1</i>    | 17.579                            | 6.617                         | 1.410                 | 7.00E-03                  |
| <i>RASSF6</i>   | 6.748                             | 2.557                         | 1.400                 | 7.00E-03                  |
| <i>PTGS2</i>    | 70.011                            | 27.313                        | 1.358                 | 7.00E-03                  |
| <i>HAS2</i>     | 3.193                             | 1.283                         | 1.316                 | 7.00E-03                  |
| <i>LCA5</i>     | 4.648                             | 2.107                         | 1.141                 | 7.00E-03                  |
| <i>KIAA1217</i> | 5.928                             | 2.745                         | 1.111                 | 7.00E-03                  |
| <i>GDF15</i>    | 37.642                            | 17.489                        | 1.106                 | 7.00E-03                  |
| <i>SLC25A12</i> | 24.984                            | 11.829                        | 1.079                 | 7.00E-03                  |
| <i>SYNE1</i>    | 4.393                             | 2.135                         | 1.041                 | 7.00E-03                  |
| <i>ACTL8</i>    | 5.405                             | 2.698                         | 1.002                 | 7.00E-03                  |
| <i>ZNF521</i>   | 26.537                            | 13.291                        | 0.998                 | 7.00E-03                  |
| <i>DCDC2</i>    | 3.038                             | 1.547                         | 0.974                 | 7.00E-03                  |
| <i>RASEF</i>    | 5.283                             | 2.751                         | 0.941                 | 7.00E-03                  |
| <i>SPOCK1</i>   | 6.954                             | 3.623                         | 0.941                 | 7.00E-03                  |
| <i>CXCL3</i>    | 150.491                           | 81.539                        | 0.884                 | 7.00E-03                  |
| <i>CIITA</i>    | 6.110                             | 3.323                         | 0.879                 | 7.00E-03                  |
| <i>CNTNAP2</i>  | 3.056                             | 1.674                         | 0.868                 | 7.00E-03                  |
| <i>F3</i>       | 68.306                            | 37.659                        | 0.859                 | 7.00E-03                  |
| <i>ZC3H12C</i>  | 8.654                             | 4.811                         | 0.847                 | 7.00E-03                  |
| <i>CENPE</i>    | 8.373                             | 4.684                         | 0.838                 | 7.00E-03                  |
| <i>SH3BGRL2</i> | 13.933                            | 8.019                         | 0.797                 | 7.00E-03                  |
| <i>GAB2</i>     | 7.538                             | 4.376                         | 0.785                 | 7.00E-03                  |
| <i>RAET1L</i>   | 7.078                             | 4.158                         | 0.767                 | 7.00E-03                  |
| <i>DKK1</i>     | 325.257                           | 191.410                       | 0.765                 | 7.00E-03                  |
| <i>SEMA3C</i>   | 11.060                            | 6.575                         | 0.750                 | 7.00E-03                  |
| <i>SLCO4C1</i>  | 18.283                            | 11.040                        | 0.728                 | 7.00E-03                  |
| <i>PROX1</i>    | 2.497                             | 1.521                         | 0.716                 | 7.00E-03                  |
| <i>MYC</i>      | 109.984                           | 67.049                        | 0.714                 | 7.00E-03                  |
| <i>PDK4</i>     | 2.148                             | 1.319                         | 0.703                 | 7.00E-03                  |
| <i>ZNF449</i>   | 2.949                             | 1.827                         | 0.691                 | 7.00E-03                  |
| <i>PHIP</i>     | 19.732                            | 12.300                        | 0.682                 | 7.00E-03                  |
| <i>FRK</i>      | 4.418                             | 2.790                         | 0.663                 | 7.00E-03                  |
| <i>PSD3</i>     | 4.998                             | 3.168                         | 0.658                 | 7.00E-03                  |
| <i>FUT1</i>     | 5.727                             | 3.640                         | 0.654                 | 7.00E-03                  |
| <i>REL</i>      | 9.195                             | 5.852                         | 0.652                 | 7.00E-03                  |
| <i>HINT3</i>    | 21.340                            | 13.636                        | 0.646                 | 7.00E-03                  |

|                 |         |         |       |          |
|-----------------|---------|---------|-------|----------|
| <i>TGFB2</i>    | 72.996  | 47.146  | 0.631 | 7.00E-03 |
| <i>CXCL2</i>    | 76.247  | 49.700  | 0.617 | 7.00E-03 |
| <i>BRAF</i>     | 18.331  | 12.013  | 0.610 | 7.00E-03 |
| <i>SMC2</i>     | 11.188  | 7.436   | 0.589 | 7.00E-03 |
| <i>MBOAT2</i>   | 3.250   | 2.160   | 0.589 | 7.00E-03 |
| <i>RNF152</i>   | 3.751   | 2.496   | 0.588 | 7.00E-03 |
| <i>ASPM</i>     | 20.746  | 13.858  | 0.582 | 7.00E-03 |
| <i>WNT5A</i>    | 99.937  | 67.020  | 0.576 | 7.00E-03 |
| <i>KIAA1462</i> | 4.315   | 2.896   | 0.575 | 7.00E-03 |
| <i>PTBP3</i>    | 40.559  | 27.353  | 0.568 | 7.00E-03 |
| <i>ZNF22</i>    | 6.955   | 4.701   | 0.565 | 7.00E-03 |
| <i>MAML2</i>    | 3.427   | 2.333   | 0.555 | 7.00E-03 |
| <i>CCDC186</i>  | 12.488  | 8.524   | 0.551 | 7.00E-03 |
| <i>CAMK4</i>    | 4.585   | 3.134   | 0.549 | 7.00E-03 |
| <i>B3GNT5</i>   | 11.133  | 7.626   | 0.546 | 7.00E-03 |
| <i>ERBIN</i>    | 29.438  | 20.168  | 0.546 | 7.00E-03 |
| <i>CLIC4</i>    | 85.985  | 59.089  | 0.541 | 7.00E-03 |
| <i>RHOBTB3</i>  | 22.501  | 15.639  | 0.525 | 7.00E-03 |
| <i>STAT5B</i>   | 6.404   | 4.454   | 0.524 | 7.00E-03 |
| <i>MITF</i>     | 25.248  | 17.567  | 0.523 | 7.00E-03 |
| <i>CEP97</i>    | 5.859   | 4.090   | 0.518 | 7.00E-03 |
| <i>PELI2</i>    | 6.283   | 4.388   | 0.518 | 7.00E-03 |
| <i>E2F7</i>     | 10.037  | 7.047   | 0.510 | 7.00E-03 |
| <i>MAL2</i>     | 70.978  | 49.922  | 0.508 | 7.00E-03 |
| <i>TMEM170B</i> | 8.774   | 6.175   | 0.507 | 7.00E-03 |
| <i>ENPP4</i>    | 9.626   | 6.783   | 0.505 | 7.00E-03 |
| <i>CKAP2L</i>   | 13.652  | 9.641   | 0.502 | 7.00E-03 |
| <i>ASNS</i>     | 303.795 | 215.047 | 0.498 | 7.00E-03 |
| <i>MSANTD4</i>  | 9.075   | 6.427   | 0.498 | 7.00E-03 |
| <i>AHR</i>      | 125.593 | 89.013  | 0.497 | 7.00E-03 |
| <i>ETV6</i>     | 16.196  | 11.488  | 0.496 | 7.00E-03 |
| <i>TMEM65</i>   | 5.951   | 4.225   | 0.494 | 7.00E-03 |
| <i>CLDN1</i>    | 19.789  | 14.051  | 0.494 | 7.00E-03 |
| <i>DGKH</i>     | 5.263   | 3.750   | 0.489 | 7.00E-03 |
| <i>PAR6B</i>    | 5.140   | 3.663   | 0.489 | 7.00E-03 |
| <i>ZBTB20</i>   | 17.028  | 12.139  | 0.488 | 7.00E-03 |
| <i>CDT1</i>     | 19.724  | 14.068  | 0.487 | 7.00E-03 |
| <i>FERMT2</i>   | 24.395  | 17.407  | 0.487 | 7.00E-03 |
| <i>BCAT1</i>    | 34.530  | 24.709  | 0.483 | 7.00E-03 |
| <i>NRAS</i>     | 120.921 | 87.365  | 0.469 | 7.00E-03 |
| <i>RAP2A</i>    | 20.428  | 14.783  | 0.467 | 7.00E-03 |
| <i>PDZD8</i>    | 22.310  | 16.153  | 0.466 | 7.00E-03 |
| <i>RAB3B</i>    | 13.733  | 9.949   | 0.465 | 7.00E-03 |
| <i>ADAM9</i>    | 33.698  | 24.416  | 0.465 | 7.00E-03 |



|                 |         |          |        |          |
|-----------------|---------|----------|--------|----------|
| <i>DEK</i>      | 78.536  | 57.287   | 0.455  | 7.00E-03 |
| <i>ETNK1</i>    | 22.034  | 16.082   | 0.454  | 7.00E-03 |
| <i>PANK3</i>    | 29.460  | 21.504   | 0.454  | 7.00E-03 |
| <i>GTF2A1</i>   | 22.513  | 16.457   | 0.452  | 7.00E-03 |
| <i>SMC3</i>     | 51.860  | 37.972   | 0.450  | 7.00E-03 |
| <i>EPRS</i>     | 122.227 | 90.342   | 0.436  | 7.00E-03 |
| <i>CDS1</i>     | 11.019  | 8.161    | 0.433  | 7.00E-03 |
| <i>FSTL1</i>    | 28.477  | 21.127   | 0.431  | 7.00E-03 |
| <i>GRPEL2</i>   | 25.764  | 19.183   | 0.426  | 7.00E-03 |
| <i>TOP2A</i>    | 119.019 | 88.799   | 0.423  | 7.00E-03 |
| <i>RSL24D1</i>  | 109.620 | 81.952   | 0.420  | 7.00E-03 |
| <i>KIF5B</i>    | 87.814  | 67.327   | 0.383  | 7.00E-03 |
| <i>TBC1D4</i>   | 38.053  | 50.390   | -0.405 | 7.00E-03 |
| <i>TRIM25</i>   | 34.226  | 46.751   | -0.450 | 7.00E-03 |
| <i>JUN</i>      | 15.031  | 20.535   | -0.450 | 7.00E-03 |
| <i>MT1E</i>     | 111.418 | 152.265  | -0.451 | 7.00E-03 |
| <i>SFN</i>      | 43.617  | 59.892   | -0.457 | 7.00E-03 |
| <i>ID1</i>      | 175.712 | 126.499  | 0.474  | 7.00E-03 |
| <i>KIFAP3</i>   | 11.918  | 16.680   | -0.485 | 7.00E-03 |
| <i>NAA35</i>    | 17.266  | 24.414   | -0.500 | 7.00E-03 |
| <i>S100A6</i>   | 787.828 | 1121.770 | -0.510 | 7.00E-03 |
| <i>BSN</i>      | 0.778   | 1.114    | -0.518 | 7.00E-03 |
| <i>MALL</i>     | 10.150  | 14.699   | -0.534 | 7.00E-03 |
| <i>RIMKLA</i>   | 1.978   | 2.882    | -0.543 | 7.00E-03 |
| <i>TNFSF9</i>   | 10.035  | 14.630   | -0.544 | 7.00E-03 |
| <i>IER5L</i>    | 13.756  | 20.082   | -0.546 | 7.00E-03 |
| <i>KREMEN1</i>  | 11.670  | 17.060   | -0.548 | 7.00E-03 |
| <i>PODXL2</i>   | 8.280   | 12.115   | -0.549 | 7.00E-03 |
| <i>SUMO3</i>    | 28.278  | 41.545   | -0.555 | 7.00E-03 |
| <i>LGALS3BP</i> | 97.715  | 143.798  | -0.557 | 7.00E-03 |
| <i>DUSP1</i>    | 4.750   | 7.006    | -0.561 | 7.00E-03 |
| <i>FRMD8</i>    | 12.265  | 18.149   | -0.565 | 7.00E-03 |
| <i>HPDL</i>     | 6.217   | 9.206    | -0.566 | 7.00E-03 |
| <i>NMU</i>      | 33.107  | 49.132   | -0.570 | 7.00E-03 |
| <i>HS6ST1</i>   | 26.581  | 39.715   | -0.579 | 7.00E-03 |
| <i>EIF2AK2</i>  | 17.183  | 25.679   | -0.580 | 7.00E-03 |
| <i>HES1</i>     | 21.764  | 32.714   | -0.588 | 7.00E-03 |
| <i>FOXF2</i>    | 4.448   | 6.717    | -0.595 | 7.00E-03 |
| <i>UBL5</i>     | 154.829 | 234.840  | -0.601 | 7.00E-03 |
| <i>CCDC85B</i>  | 17.571  | 26.759   | -0.607 | 7.00E-03 |
| <i>GMPR</i>     | 13.984  | 21.391   | -0.613 | 7.00E-03 |
| <i>JAG1</i>     | 13.907  | 21.281   | -0.614 | 7.00E-03 |
| <i>LSS</i>      | 13.238  | 20.322   | -0.618 | 7.00E-03 |
| <i>ADRB1</i>    | 2.892   | 4.468    | -0.628 | 7.00E-03 |

|                |         |         |        |          |
|----------------|---------|---------|--------|----------|
| <i>EN1</i>     | 13.370  | 20.673  | -0.629 | 7.00E-03 |
| <i>IFIH1</i>   | 10.303  | 15.932  | -0.629 | 7.00E-03 |
| <i>HMOX1</i>   | 9.469   | 14.901  | -0.654 | 7.00E-03 |
| <i>ATG3</i>    | 53.849  | 84.988  | -0.658 | 7.00E-03 |
| <i>PARP14</i>  | 16.904  | 27.016  | -0.676 | 7.00E-03 |
| <i>UBE2L6</i>  | 41.388  | 66.239  | -0.678 | 7.00E-03 |
| <i>CEBPD</i>   | 2.794   | 4.533   | -0.698 | 7.00E-03 |
| <i>SLCO4A1</i> | 11.278  | 18.566  | -0.719 | 7.00E-03 |
| <i>IGFBP6</i>  | 13.973  | 23.053  | -0.722 | 7.00E-03 |
| <i>PFKFB4</i>  | 6.369   | 10.642  | -0.741 | 7.00E-03 |
| <i>ARL15</i>   | 9.199   | 15.424  | -0.746 | 7.00E-03 |
| <i>SNX18</i>   | 24.422  | 41.026  | -0.748 | 7.00E-03 |
| <i>MT2A</i>    | 221.908 | 375.026 | -0.757 | 7.00E-03 |
| <i>SLC7A8</i>  | 19.585  | 33.177  | -0.760 | 7.00E-03 |
| <i>PCSK9</i>   | 12.356  | 21.014  | -0.766 | 7.00E-03 |
| <i>ETS2</i>    | 20.118  | 34.221  | -0.766 | 7.00E-03 |
| <i>NMNAT2</i>  | 2.537   | 4.350   | -0.778 | 7.00E-03 |
| <i>PRKCDBP</i> | 5.054   | 8.818   | -0.803 | 7.00E-03 |
| <i>IGFL1</i>   | 39.094  | 68.716  | -0.814 | 7.00E-03 |
| <i>KIZ</i>     | 42.567  | 76.271  | -0.841 | 7.00E-03 |
| <i>FZD1</i>    | 3.826   | 6.991   | -0.870 | 7.00E-03 |
| <i>BAMBI</i>   | 9.741   | 18.288  | -0.909 | 7.00E-03 |
| <i>USP18</i>   | 7.370   | 14.134  | -0.939 | 7.00E-03 |
| <i>MAOA</i>    | 3.828   | 7.344   | -0.940 | 7.00E-03 |
| <i>LAP3</i>    | 9.531   | 18.412  | -0.950 | 7.00E-03 |
| <i>LIPA</i>    | 33.875  | 65.513  | -0.952 | 7.00E-03 |
| <i>IFIT5</i>   | 11.451  | 22.208  | -0.956 | 7.00E-03 |
| <i>S100A4</i>  | 26.006  | 50.667  | -0.962 | 7.00E-03 |
| <i>ADAR</i>    | 40.904  | 79.859  | -0.965 | 7.00E-03 |
| <i>CYP2J2</i>  | 13.551  | 26.460  | -0.965 | 7.00E-03 |
| <i>S100A16</i> | 22.499  | 44.396  | -0.981 | 7.00E-03 |
| <i>KRT19</i>   | 64.781  | 128.813 | -0.992 | 7.00E-03 |
| <i>PRRX1</i>   | 2.774   | 5.519   | -0.993 | 7.00E-03 |
| <i>SOX5</i>    | 1.101   | 2.193   | -0.994 | 7.00E-03 |
| <i>PRSS35</i>  | 1.292   | 2.594   | -1.005 | 7.00E-03 |
| <i>RARRES3</i> | 5.570   | 11.585  | -1.057 | 7.00E-03 |
| <i>CHST2</i>   | 2.598   | 5.443   | -1.067 | 7.00E-03 |
| <i>HELZ2</i>   | 4.899   | 10.331  | -1.076 | 7.00E-03 |
| <i>RUNX1</i>   | 5.122   | 10.952  | -1.096 | 7.00E-03 |
| <i>OSR1</i>    | 19.148  | 41.288  | -1.108 | 7.00E-03 |
| <i>CDYL2</i>   | 4.755   | 10.708  | -1.171 | 7.00E-03 |
| <i>CECR6</i>   | 1.073   | 2.432   | -1.180 | 7.00E-03 |
| <i>PLSCR1</i>  | 7.855   | 18.212  | -1.213 | 7.00E-03 |
| <i>DHRS2</i>   | 5.877   | 14.678  | -1.321 | 7.00E-03 |

|                 |         |         |        |          |
|-----------------|---------|---------|--------|----------|
| <i>EYA1</i>     | 1.822   | 4.592   | -1.334 | 7.00E-03 |
| <i>ZC3HAV1</i>  | 5.336   | 13.598  | -1.350 | 7.00E-03 |
| <i>APCDD1</i>   | 16.471  | 45.795  | -1.475 | 7.00E-03 |
| <i>PTPRZ1</i>   | 0.500   | 1.433   | -1.520 | 7.00E-03 |
| <i>TNS4</i>     | 0.370   | 1.072   | -1.533 | 7.00E-03 |
| <i>OAS3</i>     | 22.496  | 73.706  | -1.712 | 7.00E-03 |
| <i>EPSTI1</i>   | 1.286   | 4.280   | -1.735 | 7.00E-03 |
| <i>KRT75</i>    | 0.489   | 1.653   | -1.758 | 7.00E-03 |
| <i>HERC6</i>    | 1.308   | 4.655   | -1.832 | 7.00E-03 |
| <i>FOS</i>      | 2.653   | 9.522   | -1.844 | 7.00E-03 |
| <i>ISG15</i>    | 83.998  | 373.081 | -2.151 | 7.00E-03 |
| <i>EGR1</i>     | 8.065   | 35.947  | -2.156 | 7.00E-03 |
| <i>MX2</i>      | 2.294   | 11.546  | -2.332 | 7.00E-03 |
| <i>IFI27</i>    | 5.262   | 30.442  | -2.532 | 7.00E-03 |
| <i>IFI6</i>     | 22.090  | 151.523 | -2.778 | 7.00E-03 |
| <i>NR4A1</i>    | 0.763   | 5.660   | -2.892 | 7.00E-03 |
| <i>KRT85</i>    | 0.330   | 4.143   | -3.649 | 7.00E-03 |
| <i>KRT5</i>     | 0.244   | 5.401   | -4.468 | 7.00E-03 |
| <i>SEMA7A</i>   | 3.626   | 1.680   | 1.110  | 1.31E-02 |
| <i>DST</i>      | 7.369   | 3.954   | 0.898  | 1.31E-02 |
| <i>NCOA7</i>    | 9.304   | 5.019   | 0.890  | 1.31E-02 |
| <i>RYR2</i>     | 1.442   | 0.843   | 0.774  | 1.31E-02 |
| <i>SOCS4</i>    | 12.688  | 8.283   | 0.615  | 1.31E-02 |
| <i>ACER3</i>    | 6.857   | 4.599   | 0.576  | 1.31E-02 |
| <i>IFRD1</i>    | 59.288  | 40.963  | 0.533  | 1.31E-02 |
| <i>TMEM56</i>   | 6.590   | 4.569   | 0.528  | 1.31E-02 |
| <i>FAM84B</i>   | 11.590  | 8.547   | 0.439  | 1.31E-02 |
| <i>HAUS6</i>    | 14.790  | 10.927  | 0.437  | 1.31E-02 |
| <i>NHLRC2</i>   | 17.774  | 13.390  | 0.409  | 1.31E-02 |
| <i>HIST1H3H</i> | 135.623 | 179.308 | -0.403 | 1.31E-02 |
| <i>BHLHE40</i>  | 17.048  | 22.947  | -0.429 | 1.31E-02 |
| <i>HIST3H2A</i> | 76.402  | 105.096 | -0.460 | 1.31E-02 |
| <i>NKD2</i>     | 19.684  | 12.689  | 0.633  | 1.31E-02 |
| <i>CCDC80</i>   | 2.334   | 3.666   | -0.652 | 1.31E-02 |
| <i>SSH3</i>     | 4.696   | 7.835   | -0.739 | 1.31E-02 |
| <i>PARP12</i>   | 9.259   | 16.895  | -0.868 | 1.31E-02 |
| <i>MX1</i>      | 1.175   | 8.449   | -2.847 | 1.31E-02 |
| <i>HPGD</i>     | 7.041   | 2.984   | 1.238  | 1.88E-02 |
| <i>DAAM1</i>    | 4.622   | 2.609   | 0.825  | 1.88E-02 |
| <i>CEP135</i>   | 5.827   | 3.722   | 0.647  | 1.88E-02 |
| <i>VAMP4</i>    | 2.743   | 1.794   | 0.613  | 1.88E-02 |
| <i>VASH2</i>    | 5.951   | 3.930   | 0.599  | 1.88E-02 |
| <i>MOB3B</i>    | 1.982   | 1.337   | 0.568  | 1.88E-02 |
| <i>DEPDC1</i>   | 18.030  | 12.562  | 0.521  | 1.88E-02 |

|                 |         |         |        |          |
|-----------------|---------|---------|--------|----------|
| <i>KIF21B</i>   | 6.753   | 4.721   | 0.516  | 1.88E-02 |
| <i>CCDC50</i>   | 32.738  | 23.351  | 0.487  | 1.88E-02 |
| <i>FBXO30</i>   | 4.403   | 3.250   | 0.438  | 1.88E-02 |
| <i>KLF2</i>     | 9.194   | 13.498  | -0.554 | 1.88E-02 |
| <i>HNRNPR</i>   | 38.523  | 14.716  | 1.388  | 2.39E-02 |
| <i>SESTD1</i>   | 3.635   | 2.496   | 0.542  | 2.39E-02 |
| <i>RFX3</i>     | 15.288  | 11.228  | 0.445  | 2.39E-02 |
| <i>OGFRL1</i>   | 4.671   | 3.496   | 0.418  | 2.39E-02 |
| <i>MB21D2</i>   | 30.141  | 39.006  | -0.372 | 2.39E-02 |
| <i>EREG</i>     | 18.032  | 23.770  | -0.399 | 2.39E-02 |
| <i>ID3</i>      | 120.762 | 162.900 | -0.432 | 2.39E-02 |
| <i>SRM</i>      | 46.920  | 64.162  | -0.452 | 2.39E-02 |
| <i>SERPINE2</i> | 26.300  | 38.295  | -0.542 | 2.39E-02 |
| <i>COL15A1</i>  | 1.683   | 2.474   | -0.556 | 2.39E-02 |
| <i>ATL3</i>     | 1.530   | 2.285   | -0.579 | 2.39E-02 |
| <i>MT1X</i>     | 0.895   | 9.978   | -3.479 | 2.39E-02 |
| <i>LDLRAP1</i>  | 11.054  | 7.523   | 0.555  | 2.92E-02 |
| <i>ARRDC4</i>   | 3.704   | 2.618   | 0.501  | 2.92E-02 |
| <i>ZNF121</i>   | 17.915  | 13.476  | 0.411  | 2.92E-02 |
| <i>PODXL</i>    | 32.906  | 43.772  | -0.412 | 2.92E-02 |
| <i>HK2</i>      | 23.751  | 31.763  | -0.419 | 2.92E-02 |
| <i>STAT1</i>    | 22.198  | 7.059   | 1.653  | 2.92E-02 |
| <i>GLI3</i>     | 0.809   | 3.377   | -2.061 | 2.92E-02 |
| <i>POLI</i>     | 3.158   | 1.902   | 0.731  | 3.38E-02 |
| <i>EGF</i>      | 2.189   | 1.336   | 0.712  | 3.38E-02 |
| <i>SEPSECS</i>  | 4.463   | 2.973   | 0.586  | 3.38E-02 |
| <i>CEP78</i>    | 7.073   | 4.750   | 0.574  | 3.38E-02 |
| <i>TTC39B</i>   | 2.857   | 1.997   | 0.517  | 3.38E-02 |
| <i>LYST</i>     | 2.771   | 1.943   | 0.512  | 3.38E-02 |
| <i>MAN2A1</i>   | 17.008  | 12.074  | 0.494  | 3.38E-02 |
| <i>BIRC2</i>    | 25.435  | 18.948  | 0.425  | 3.38E-02 |
| <i>UTRN</i>     | 7.998   | 5.980   | 0.419  | 3.38E-02 |
| <i>PPM1H</i>    | 9.956   | 7.480   | 0.413  | 3.38E-02 |
| <i>PRSS23</i>   | 14.378  | 20.758  | -0.530 | 3.38E-02 |
| <i>SCARB1</i>   | 11.561  | 16.820  | -0.541 | 3.38E-02 |
| <i>FBL</i>      | 63.745  | 105.223 | -0.723 | 3.38E-02 |
| <i>HR</i>       | 2.650   | 4.498   | -0.763 | 3.38E-02 |
| <i>HSPH1</i>    | 9.618   | 4.181   | 1.202  | 3.84E-02 |
| <i>B3GALT1</i>  | 1.258   | 0.731   | 0.783  | 3.84E-02 |
| <i>SKIL</i>     | 6.720   | 4.481   | 0.585  | 3.84E-02 |
| <i>SYK</i>      | 7.024   | 5.094   | 0.464  | 3.84E-02 |
| <i>ZDHHC21</i>  | 3.520   | 2.593   | 0.441  | 3.84E-02 |
| <i>AK3</i>      | 30.412  | 22.490  | 0.435  | 3.84E-02 |
| <i>SMC5</i>     | 14.192  | 10.698  | 0.408  | 3.84E-02 |

|                 |         |         |        |          |
|-----------------|---------|---------|--------|----------|
| <i>F2RL1</i>    | 26.066  | 19.829  | 0.395  | 3.84E-02 |
| <i>SMIM3</i>    | 11.199  | 15.060  | -0.427 | 3.84E-02 |
| <i>ATP1B1</i>   | 129.092 | 175.732 | -0.445 | 3.84E-02 |
| <i>NTN4</i>     | 4.769   | 3.036   | 0.652  | 4.27E-02 |
| <i>ARHGAP29</i> | 8.803   | 6.144   | 0.519  | 4.27E-02 |
| <i>ATAD2</i>    | 35.590  | 26.955  | 0.401  | 4.27E-02 |
| <i>QSER1</i>    | 22.115  | 17.109  | 0.370  | 4.27E-02 |
| <i>SLC46A3</i>  | 4.907   | 7.043   | -0.521 | 4.27E-02 |
| <i>RTN4R</i>    | 3.232   | 6.154   | -0.929 | 4.27E-02 |
| <i>EGR4</i>     | 0.512   | 1.366   | -1.415 | 4.27E-02 |
| <i>UGGT2</i>    | 7.961   | 5.505   | 0.532  | 4.69E-02 |
| <i>KIF20B</i>   | 16.152  | 11.717  | 0.463  | 4.69E-02 |
| <i>OTUD3</i>    | 6.783   | 5.033   | 0.430  | 4.69E-02 |
| <i>PIM3</i>     | 43.498  | 56.453  | -0.376 | 4.69E-02 |
| <i>TRIB1</i>    | 16.969  | 22.505  | -0.407 | 4.69E-02 |
| <i>B4GALNT4</i> | 16.973  | 22.612  | -0.414 | 4.69E-02 |
| <i>SLC25A28</i> | 5.908   | 10.257  | -0.796 | 4.69E-02 |
| <i>CYP11A1</i>  | 1.414   | 3.772   | -1.416 | 4.69E-02 |

---

Abbreviations: FPKM (fragments per kilobase million)

<sup>†</sup>*P* values were calculated by a two-sided Student's *t*-test

Table S6. Probes or primers sequence used in the study

| Electrophoretic mobility shift assay (5'-3') |         |                            |
|----------------------------------------------|---------|----------------------------|
| rs61926301-G                                 | Forward | CCCCGCCCCCAGGCTTGTGTAGATC  |
|                                              | Reverse | GATCTACACAAGCCTGGGGGCGGGG  |
| rs61926301-T                                 | Forward | CCCCGCCCCCAGTCTTGTGTAGATC  |
|                                              | Reverse | GATCTACACAAGACTGGGGGCGGGG  |
| rs7959129-G                                  | Forward | TTGATATGTGTGGTTTTTTTTTTGAT |
|                                              | Reverse | ATCAAAAAAAAAACCACACATATCAA |
| rs7959129-T                                  | Forward | TTGATATGTGTGGTTTTTTTTTTGAT |
|                                              | Reverse | ATCAAAAAAAAAACCACACATATCAA |
| qRT-PCR (5'-3')                              |         |                            |
| <i>GAPDH</i>                                 | Forward | CCTCCCGCTTCGCTCTCT         |
|                                              | Reverse | TGGCGACGCAAAGAAGAT         |
| <i>ATF1</i>                                  | Forward | GTCTACAGAAAGTCTCCTAACACT   |
|                                              | Reverse | TGTGGCAGAGAAGTAGCTGAAG     |
| <i>BIRC2</i>                                 | Forward | AATGGAAGATAGCACGAT         |
|                                              | Reverse | TCTGAGACAGGCACCC           |
| <i>BRAF</i>                                  | Forward | CACTTGGTAGACGGGACT         |
|                                              | Reverse | AAGGCTTGTAAGTCTGCTGA       |
| <i>NRAS</i>                                  | Forward | AAACAAGCCCACGAAC           |
|                                              | Reverse | CAATCCCATACAACCCT          |
| <i>CAMK4</i>                                 | Forward | GGTTGTGCCTATGGACC          |
|                                              | Reverse | AATGTAGTCAGCCGTTTCT        |
| <i>EREG</i>                                  | Forward | GGGAGGAGGATGGAGA           |
|                                              | Reverse | TGTTATTGACACTTGAGCC        |
| <i>RASS</i>                                  | Forward | GGCAAATAATTGTTGA           |
|                                              | Reverse | ACATAGGAATCTGGGTC          |
| <i>DAAM</i>                                  | Forward | TCACCCAGAAATCACG           |
|                                              | Reverse | GTCCAGTTCATCCACCA          |
| <i>MYC</i>                                   | Forward | AGTTTCATCTGCGACCCG         |
|                                              | Reverse | GCTGCCGCTGTCTTTGC          |
| <i>SKIL</i>                                  | Forward | GAGGCAAGTAAGTCCATA         |
|                                              | Reverse | GCATCTAAACGGCTACA          |
| <i>EIF2AK2</i>                               | Forward | GGAAAGCGAACAAGGA           |
|                                              | Reverse | ATGATGCCATCCCGTA           |
| <i>MAML2</i>                                 | Forward | CCCAGTCCAAGTCCTA           |
|                                              | Reverse | TTGCTGTTTCTGCTCCA          |
| <i>SOCS4</i>                                 | Forward | AAATCAGATGAATGGGTAAG       |
|                                              | Reverse | AAAGCATTGTCCGGTGG          |
| <i>ERBIN</i>                                 | Forward | GACCGACTTATTCCTGC          |
|                                              | Reverse | GAGTTCTTCCCGCTGA           |
| <i>PARD6B</i>                                | Forward | GGATGGCTCCAGTGTC           |
|                                              | Reverse | TGATGAGGTTACGGCTA          |
| <i>STAT1</i>                                 | Forward | GCTTCTTGGTCCTAACG          |

|                                                              |         |                            |
|--------------------------------------------------------------|---------|----------------------------|
|                                                              | Reverse | TCGCTCCTTGCTGATG           |
| <i>ID1</i>                                                   | Forward | CTACGACATGAACGGCTGTTACTC   |
|                                                              | Reverse | GCTCCAACCTGAAGGTCCCTGAT    |
| <i>NKD2</i>                                                  | Forward | CGTTCACGCTCTATGACTTTGAC    |
|                                                              | Reverse | GCCAGTTCACCCTCCATCC        |
| <i>SCARB1</i>                                                | Forward | CCCATCCTCACTTCCTCAA        |
|                                                              | Reverse | TGCCTGCGACAGATTTCA         |
| <i>SP1</i>                                                   | Forward | CACTCTCACACCCATTGCCT       |
|                                                              | Reverse | CTTCCTCTCCACCTGCTGTG       |
| <i>GATA3</i>                                                 | Forward | GTCCTGTGCGAACTGTCAGA       |
|                                                              | Reverse | CGAGCTGTTCTTGGGGAAGT       |
| <hr/>                                                        |         |                            |
| Chromosome conformation capture (3C) assay (5'-3')           |         |                            |
| P1-E1~E16                                                    | Forward | GCCATAGCCTACCCCAAACGCAC    |
| P1-E1                                                        | Reverse | AGGAAGCACACTTTTTCAAATAA    |
| P1-E2                                                        | Reverse | TAACGGGACCCTATCTCTAAGAAAA  |
| P1-E3                                                        | Reverse | ACTCCTGGTATCAAGCCATCCTCCT  |
| P1-E4                                                        | Reverse | AAATTAATGAGATAGGGAGCCATG   |
| P1-E5                                                        | Reverse | AAATCAGAGCTGGGCGTGGTGGTTC  |
| P1-E6                                                        | Reverse | AAAATTGGCCGGGCACGGTGGCTCA  |
| P1-E7                                                        | Reverse | TACTTTTGGCCAGACACGGTGGCTC  |
| P1-E8                                                        | Reverse | TTCTCCGACCCAAAGGGCCAAAAAT  |
| P1-E9                                                        | Reverse | AAATCAGCCTGGCAGGTGGCTCAG   |
| P1-E10                                                       | Reverse | TAAGTTGGCCGGGCACAGTGGCTCA  |
| P1-E11                                                       | Reverse | TATTTTATAGTAAATGGGGTTTTG   |
| P1-E12                                                       | Reverse | TATTGTCTAAAATGTTACTTGCTGA  |
| P1-E13                                                       | Reverse | GTACCGTGGAAATTTACTATCTTTTT |
| P1-E14                                                       | Reverse | ATTTGTTTGTGTTTTTTTGGAGACA  |
| P1-E15                                                       | Reverse | TTGGCAGGCTGGGCACAGTGGCTCA  |
| P1-E16                                                       | Reverse | TGGTTGGTTCTTGGCTGGAGGCTGC  |
| <i>GAPDH</i>                                                 | Forward | ACAGTCCATGCCATCACTGCC      |
| <i>GAPDH</i>                                                 | Reverse | GCCTGCTTCACCACCTTCTTG      |
| <hr/>                                                        |         |                            |
| Chromatin immunoprecipitation qPCR (ChIP-qPCR) assay (5'-3') |         |                            |
| DNA fragment                                                 | Forward | GTGCTCAGTTTTGCCCCCTCC      |
| spanning rs61926301                                          | Reverse | TGTCCTAAGCTACCGTTTCCTC     |
| DNA fragment                                                 | Forward | TGTTACTTGCTGATTATAGTGGCTT  |
| spanning rs7959129                                           | Reverse | GACCCTGTTTCAGAAAAGTAAGATA  |
| <hr/>                                                        |         |                            |
| siRNAs                                                       |         |                            |
|                                                              | siRNA1  | CCAAGAACAGCTCGTTTAA        |
| siGATA3                                                      | siRNA2  | CCTGTGGGCTCTACTACAA        |
|                                                              | siRNA3  | GAGAAAGAGTGCCTCAAGT        |
|                                                              | siRNA1  | ATCACTCCATGGATGAAATGA      |
| siSP1                                                        | siRNA2  | AAGCGCTTCATGAGGAGTG        |
|                                                              | siRNA3  | GCCAATAGCTACTCAACTA        |
| siATF1                                                       | siRNA1  | CGAACTACACCTTCAGCTA        |



siRNA2 CCACAAGAGTACCACGTCA  
siRNA3 GTACAACTATTCTTCAGTA

---

sgRNAs used in CRISPR/Cas9

---

|             |        |                         |
|-------------|--------|-------------------------|
|             | sgRNA1 | CCAGCAATCAGGTGGTCGTACAA |
| <i>ATF1</i> | sgRNA2 | GTTTACCATCTAGCTGCATCAGG |
|             | sgRNA3 | CCTCTCAGACAACTAAGACAGAT |

---
